# Supplementary material for: Microglial trogocytosis and the complement system regulate axonal pruning in vivo
Source: eLife. 2021 Mar 16;10:e62167. doi: 10.7554/eLife.62167 (PMC7963485; doi:10.7554/eLife.62167)
Supplement: Figure 1—source data 1. [file elife-62167-fig1-data1.xlsx]

## Sheet: Sheet1
Fig. 1C
Microglial mobility (µm/min)
Animal 1	Animal 2	Animal 3	Animal 4	Animal 5
1.608	2.106	1.813	0.676	0.715
1.402	1.406	1.2	1.965	1.476
5.651	1.633	1.09	2.666	1.821
1.898	1.341	3.158	2.863	2.071
0.917	2.086	2.261	0.717	1.016
4.14	1.926	1.606	1.744	1.909
1.386	2.019	1.352	1.527	1.012
1.982	2.438	3.534	0.929	1.097
1.425	1.843	0.451	1.273	0.887
1.447	2.058	1.605	1.502	1.41
1.894	1.468	1.287	1.851	0.984
2.854	0.919	1.102	2.602	1.741
1.445	3.041	1.805	1.465	0.935
2.061	1.117	2.116	1.327	1.36
2.451	1.604	1.351	1.512	1.037
		2.659	0.849	0.773
