# Supplementary material for: Microglial trogocytosis and the complement system regulate axonal pruning in vivo
Source: eLife. 2021 Mar 16;10:e62167. doi: 10.7554/eLife.62167 (PMC7963485; doi:10.7554/eLife.62167)
Supplement: Figure 2—figure supplement 1—source data 1. [file elife-62167-fig2-figsupp1-data1.xlsx]

## Sheet: Sheet1
Fig. 2--figure supplement 1A
Log₂ fold change in green fluorescence
	-72	-66	-60	-54	-48	-42	-36	-30	-24	-18	-12	-6	0	6	12	18	24	30	36	42	48	54	60	66	72	78	84	90	96	102	108	114	120	126	132	138	144	150	156
Microglia 1	-0.0549268	-0.0771241	0.115745	-0.03702	0.079277	0.0896707	-0.0389724	0.0807583	0.146475	-0.0291828	-0.016904	-0.313862	2.80788	1.41049	1.95926	2.3081	2.63977	2.6766	2.38254	2.65066	1.82957	2.97977	3.32528	3.11949	3.58796	2.81614	0.961917	2.02422	2.74083	1.6345	1.67872	1.48754	1.21791	1.34798	0.964451	0.846021	1.64336	1.90122	1.03843
Microglia 2																								0.012941	0.561515	0.716992	0.638471	0.563701	0.722435	0.570948	0.46843	0.098142	1.14233	1.02999	0.853172	0.099039	-0.17279	-0.05527	0.450904
Microglia 3	-0.0574079	-0.0605419	-0.04373	-0.02215	-0.05487	-0.0537915	-0.0288063	-0.0544077	0.0516606	0.0628892	0.00616525	0.0799961	0.00533282	0.0703036	0.08398	0.10098	0.104969	0.030575	0.03211	0.043523	-0.00894	-0.01909	-0.01666	-0.00246	-0.00039	-0.01998	-0.01599	-0.06554	-0.30469							-0.05871	0.009537	-0.02009	-0.05565
Microglia 4	-0.172457	-0.0482379	0.010952			0.23146	-0.0440111	-0.0366928	0.112148	0.0969277		-0.0688254	0.0643141	0.0960047	0.011735	0.095318	-0.23122	-0.1967	-0.24512	-0.19558	-0.21974	-0.01688	0.079893	-0.01671	-0.1314	-0.22196	-0.16729	-0.22726	-0.15527	-0.0570826	0.017183	-0.04301	-0.05638	0.3562	0.247785	0.088604	-0.00981	-0.12767	-0.17497
Microglia 5																				0.035752	-0.05027			-0.04266	0.111358			-0.08813	-0.08124			-0.10942	-0.104	-0.22487	-0.23171	-0.03374	0.250053	0.19351	0.260248
Microglia 6																									-0.00098	-0.13494	-0.3325	0.179471	0.081585	0.101355	0.262688	0.122749	-0.25165						-0.14573
Microglia 7											0.0837917	0.228065	0.128161	0.0897703	0.135981	-0.07021	-0.02264	-0.24352		-0.31267	-0.16474	-0.02153	0.063849	-0.00686	-0.03878	0.049601	-0.00105	-0.12024	-0.23061	-0.194334	-0.24026	-0.08721	-0.07452	-0.35185	-0.13648	-0.32338	-0.16714	-0.16816	-0.19346
Microglia 8	0.0360579	0.133021	0.210344	-0.20096	-0.22586	0.0817113	0.164354	-0.021647	-0.080939	0.170103	0.0700996	-0.172546	-0.278604
Microglia 9						0.115754	0.306261	-0.0359715	-0.131549	-0.335373	-0.013013	0.448784	0.223443	-0.128692	-0.21608	-0.23981	-0.186	-0.05374	-0.1313	0.134657																0.002225	-0.25772	-0.14151
Microglia 10	-0.108333	-0.158227	0.010488					0.153935	0.192237	-0.368607	-0.289595	-0.104786	0.0876507	-0.0439375	-0.11321	-0.09186	0.176385	0.083687	0.209461	0.175242	0.029295
Microglia 11																						-0.13777		-0.08655	-0.17612	0.075746	-0.0041	0.265674	0.107047	0.0903552	0.235426
Microglia 12					-0.24953	0.171882	0.0353304
Microglia 13	0.18169	0.38124				0.355291	-0.135326	-0.182874	-0.073419	-0.182068
Microglia 14																				-0.09398	0.053759	0.113154	-0.08389
Microglia 15																								-0.23195	-0.17174	0.116149	0.136396	0.272548	0.289624	-0.0834576	-0.24587	-0.30294	-0.1184	-0.06799	0.124754	0.116758
Microglia 16			-0.08016	0.046168	0.189983	0.109398	-0.0653982	-0.240721
Fig. 2--figure supplement 1B
Log₂ fold change in green fluorescence
	-60	-54	-48	-42	-36	-30	-24	-18	-12	-6	0	6	12	18	24	30	36	42	48	54	60	66	72	78	84	90	96	102	108	114	120	126	132	138	144	150	156	162	168	174	180	186	192	198	204	210	216	222	228
Microglia 1	0.0543564	0.475323	0.207634	0.057444	-0.16562	-0.286436	-0.40124	-0.183967	-0.071122	0.104483	4.16321	3.81647	3.86898	3.92827	3.70465	3.65115	3.92567	3.92715	4.53966	4.19532	2.91498	4.11475	4.19924	3.86407	4.12441	4.01858	4.15229	4.24826	4.29266	3.82067	3.88192	3.96512	3.98241	4.01003	3.98934	3.89698	4.0069	3.77516	3.67932	3.57655	3.67315	3.22825	2.30048	2.48718	2.70026	2.57952	2.62248	2.6295	2.16653
Microglia 2	-0.259325	-0.304019	-0.54885	-0.49785	-0.40543	-0.32157	-0.352601	-0.329215	-0.200762	0.374573	0.324676	0.191116	0.48653	0.438526	0.596063	0.571315	0.473407	0.436391	1.08794	1.15646	1.13468	0.263125	0.632148	0.13183	0.21206	-0.32237	0.947305	1.42112	1.83685	1.77847	1.02716	-0.09631	-0.18297	-0.11933	0.056788	-0.20946	0.687133	-0.16414	-0.4379	-0.20298	0.750539	-0.98328	-0.62332	-0.1013	0.196871	0.211644	-0.00085	-0.31416	-0.49763
Microglia 3				0.149038	-0.62291	-0.0539143	0.214204	0.0012273	-0.050572	0.204167
Microglia 4	0.486449	0.57309	0.216711	-0.1529	-0.4276	-0.499654
Microglia 5		0.197369	0.064912	0.659653	0.053605	0.0172363	0.0896195	-0.294768	-0.61827	-0.243715	0.0864913	-0.268027	-0.0349262	-0.181035	-0.05812	0.126413	0.023793	-0.2376	-0.25616	-0.67816	-0.35424	-0.82046	-0.91042	-0.29075	-0.65658	-0.14187	-0.12324	-0.90173	-0.68712	-1.0426	-1.02487	-0.84377	-0.95278	-0.81901	-0.67207	-1.0426	-0.31347	-0.23572	0.53626	0.825836	1.03644
Microglia 6													0.304728	0.406366	0.316496	0.32944	0.371863	0.056224	0.053324	0.059042	-0.05999	-0.51405	-0.48841	-0.43655	-0.32442	-0.28543	-0.3326	0.091639	-0.05344	-0.354347	-0.39683	-0.225	-0.65038	0.10614	-0.056	-0.18641	-0.5267	-0.17164	-0.72897	-0.20308	0.108195	-0.33102	-0.44507	-0.10083	-0.16498	-0.13981	-0.17485	0.188441	-0.02266
Microglia 7	0.0387804	0.594339	0.534801	0.264862	0.49093	0.378272	0.338349	0.542999	0.577438	0.492	-0.00746545	-0.272531	-0.313703	-0.491753	-0.03637	-0.09252	0.026662	-0.40437	0.021655	-0.24824	-0.05639	-0.87433	-1.0896	-1.05497	-0.70188	-0.75745	-1.00649	-1.08988	-1.44749	-1.53819	-1.3959	-1.05065	-0.77069	-1.10504	-0.52494	-0.52513	0.595394	0.439231	0.392069	0.254137	-0.56237	-0.84684	-0.67174	-0.24189	-0.71745	-0.81191	-0.71912	-0.27778	-0.95305
Microglia 8	-0.393788	-0.0239571	-0.49912	-0.45134	-0.1988	-0.31071	-0.08593	-0.395057	0.0632126	-0.0393966	0.293869	0.260375	0.377661	0.337194	0.308465	0.352516	0.571438	0.316724	0.290225	0.530367	0.248951	-0.05708	0.00444	-0.26466	-0.13284	-0.01641	-0.04482	-0.06838	-0.04961	-0.103126	-0.07953	0.046474	0.080573	0.013342	0.235767	0.309925	0.053362	-0.12189	-0.2586	-0.27387	-0.3887	-0.10764	-0.1839	0.146383	0.409467	0.44418	0.243324	0.613187	0.277255
Microglia 9	0.0447396	0.0743944	0.167635	-0.03457	0.010987	-0.0433765	0.22153	-0.211513	-0.042708	-0.175871	0.1395	-0.0929276	0.123497	-0.238681	-0.03457	0.062257	-0.09667	0.952469	1.08979	1.11519	0.889866	-0.18573	-0.23318	0.105022	-0.04512	-0.25532	-0.28904	-0.6716	-0.89679	-0.549506	-0.54382	-0.37517	-0.60471	0.01176	-0.38159	-0.4832	0.359499	-0.87305	-1.07764	-1.08285	-0.39382	-0.43888	-0.08533
Microglia 10																																													-0.34344	-0.38328	0.023648	0.041983	-0.09591
Microglia 11																					-0.02439	-0.0037	0.041466	0.070872	-0.23852	0.130244	-0.04643	-0.04251	-0.15427	-0.568272	-0.15071	0.022568	0.028236	0.213383	0.154013	0.31612	-0.12693	0.158677	-0.12584	-0.41328	-0.06951	-0.1978	-0.14131	-1.01959	-0.39063	-0.25172	-0.16981	-0.03337	-0.0094
Microglia 12	-0.129661	-0.298463	-0.19655	-0.20046	0.099017	-0.285143	-0.029524	-0.0448594	0.106498	0.165546	0.213816	0.159902	0.0171298	0.115233	0.162003	0.128431	0.425882	0.270062	0.045366	-0.09681	-0.08368	-0.57712	-0.80374	-1.05913	-0.71282	-0.91703	-0.89355	-0.70957	-0.76788	-0.963907	-0.95483	-0.29155	-0.27313	-0.32242	-0.55643	-0.81343	-0.81365	-1.22076	-1.01986	-0.83843	-0.83095	-0.82552	-0.88999	-0.65237	-0.76695	-1.06459	-0.71948	-0.2398	-0.60773
Microglia 13	0.128108	-0.268582	-0.1901	0.199766	0.293477	0.175749	-0.187284	0.0266667	0.276618	-0.477103	-0.45907	0.156207	0.374403	-0.356759	-0.07234	-0.02074	-0.23379	0.920527	0.885299	0.915981	0.711774	0.232329	0.043725	0.126299	0.271146	-0.13083	0.131087	0.001928	0.220172	0.274416	0.215246	0.546282	0.333607	0.714666	0.533102	0.259396	0.678779	0.236275	0.236526	0.145533	0.672162	0.375012	0.120406	-0.07598	-0.28533	-0.05398	0.157536	0.137834	0.065972
Microglia 14
Microglia 15
Microglia 16			-0.10073	-0.3773	-0.23435	-0.101028	-0.638376	-0.420291	-0.614628	-0.340914	-0.0269881	-0.00769039	-0.125539	0.33434	0.355877	0.68447	0.71571	0.086842	0.507161	0.342936	0.375678	0.414138	0.524618	0.470867	0.617364	0.767871	0.882328	0.892734	0.288544	0.473656	0.20766	0.44674	0.487913	0.751112	0.592899	0.445997	0.82379	0.6714	0.823582	0.57186	0.731385	0.872752	0.600027	0.534128	0.380003	0.588189	0.969206	1.05983	1.09126
Microglia 17	0.339032	0.354737	0.58067	0.791185	0.073728	-0.0242302	-0.624726	-0.441008	-0.426676	0.145239	-0.0797909	-0.0533962	0.0992942	-0.0190727	-0.0619	-0.01388	0.103287	-0.21548	-0.40442	-0.44582	-0.69459	-0.94927	-0.40997	-0.75249	-1.0848	-1.37331	-1.10127	-1.21357	-1.17944	-1.07427	-1.02165	-0.86402	-0.48558	-1.20838	-1.21496	-1.01429	0.051646	-0.89583	-1.4228	-1.38354	-0.40001	-1.13544	-0.33379	-0.3047	-0.63482	-0.87696	-0.25964	-0.17218	-0.03956
Microglia 18
[truncated: 26 more columns]
