# Supplementary material for: Microglial trogocytosis and the complement system regulate axonal pruning in vivo
Source: eLife. 2021 Mar 16;10:e62167. doi: 10.7554/eLife.62167 (PMC7963485; doi:10.7554/eLife.62167)
Supplement: Figure 3—figure supplement 1—source data 1. [file elife-62167-fig3-figsupp1-data1.xlsx]

## Sheet: Sheet1
Fig. 3--fig supp 1A														Fig. 3--fig supp 1B														Fig. 3--fig supp 1C														Fig. 3--fig supp 1D
No axons														1-4 axons														5-8 axons														8-12 axons
Microglial green fluorescence				Histogram (natural log transformed)					Gaussian Poisson regression curve fit					Microglial green fluorescence				Histogram (natural log transformed)					Gaussian Poisson regression curve fit					Microglial green fluorescence				Histogram (natural log transformed)					Gaussian Poisson regression curve fit					Microglial green fluorescence				Histogram (natural log transformed)
Day 4	Day 5			Bin Center	Day 4	Day 5			Best-fit values					3.23502	2.92378			Bin Center	Day 4	Day 5			Best-fit values					Day 4	Day 5			Bin Center	Day 4	Day 5			Best-fit values					Day 4	Day 5			Bin Center	Day 4	Day 5
3.55412	2.43956			1	0	0			Amplitude	78.83	89.57			2.39144	2.39653			1	0	0			Amplitude	58.36	60.88			3.70718	3.87671			1	0	0			Amplitude	47.5	55.6			4.32583	4.83233			1	0	0
2.87799	1.99578			1.6	6	11			Mean	3	3.118			3.13936	3.51739			1.6	1	1			Mean	3.082	3.378			2.31858	3.8279			1.6	0	4			Mean	3.046	3.318			5.00908	5.23954			1.6	1	5
2.28092	4.2907			2.2	52	47			SD	0.6894	0.7191			3.05852	4.52453			2.2	37	28			SD	0.7139	0.7511			2.41554	4.49577			2.2	32	16			SD	0.6501	0.7622			2.96296	5.66829			2.2	15	11
1.90925	3.38967			2.8	72	69								2.00672	3.07615			2.8	60	35								3.28595	2.80978			2.8	38	55								3.76369	5.23653			2.8	26	14
3.27066	2.84521			3.4	64	81			Goodness of Fit					2.17816	2.42734			3.4	46	66			Goodness of Fit					3.17941	3.13505			3.4	35	50			Goodness of Fit					4.25903	2.34306			3.4	33	30
2.1425	2.97023			4	24	52			Pseudo R squared	0.972	0.9716			4.14275	4.15277			4	16	37			Pseudo R squared	0.9107	0.9419			2.46994	2.89776			4	22	34			Pseudo R squared	0.9175	0.9739			3.21448	3.68622			4	16	31
2.53718	2.97023			4.6	8	9			Model deviance, G squared	9.765	11.08			2.22246	3.69586			4.6	13	22			Model deviance, G squared	24.31	15.55			3.38471	2.96937			4.6	2	14			Model deviance, G squared	18.65	6.126			2.95094	3.64594			4.6	10	18
3.37386	2.97023			5.2	1	0			Dispersion	1.268	1.227			2.62767	2.08226			5.2	1	2			Dispersion	3.2	2.108			2.2511	3.30658			5.2	0	3			Dispersion	2.173	0.9252			4.97495	4.17219			5.2	2	6
3.36358	3.34666			5.8	0	0								2.60327	3.18374			5.8	0	0								2.11266	2.39195			5.8	0	1								4.29644	3.46755			5.8	0	2
1.89259	3.27863			6.4	0	0								3.08832	1.94451			6.4	0	0								2.41617	3.40281			6.4	0	0								3.26929	2.40407
2.76512	1.83368													3.32882	3.59065													3.42368	2.8781													3.42127	3.00585
3.58862	2.00436													2.06753	3.8178													2.89832	2.02534													2.85772	3.07331
2.62099	3.24427													3.2236	3.46414													3.62577	2.9463													1.84023	4.48841
3.12335	2.28772													3.26253	3.34958													2.98368	3.92198													4.4072	5.123
2.59778	3.51662													3.05237	4.1801													2.31325	2.6862													2.2238	3.10603
2.45165	1.78432													2.00216	2.31751													3.23726	2.8082													3.48306	2.94178
2.93647	4.43064													2.93193	1.98869													3.01097	2.95537													2.54355	4.41429
3.34018	3.6141													2.19796	3.63178													2.96932	2.89243													4.53636	4.57794
3.23272	2.58125													2.1246	2.76516													2.01107	2.514													3.38492	3.92211
1.71979	1.93554													3.03157	3.50092													2.52566	3.07961													2.20155	3.61313
4.21016	4.3807													2.26485	2.06238													3.07647	2.46016													3.6849	4.62973
4.36579	4.68331													2.51146	3.52353													2.22582	2.85002													3.53396	1.63155
3.75868	2.76758													2.569	2.93541													2.37449	4.9965													2.94353	3.07865
2.75818	2.69932													4.03829	5.00979													2.26309	3.02733													3.28398	5.77789
2.90245	3.48028													4.4256	3.32125													4.21473	3.41671													2.243	3.59778
3.5882	3.78392													4.70113	2.00805													2.54067	3.41671													3.07916	3.30556
2.51993	4.62865													3.45548	4.43231													2.69555	3.41671													2.42802	3.10493
2.94796	2.42885													2.5787	4.43231													2.74353	2.97386													3.30803	2.99954
2.0452	4.01783													3.23203	3.75178													2.47736	3.44683													4.89809	4.31734
3.80713	3.00693													2.91894	2.98615													2.81116	2.7578													2.07911	2.07262
2.69061	3.5448													3.49343	3.46342													2.59622	2.64816													3.2087	3.27849
3.44352	1.64977													3.5075	2.0605													2.86358	5.26355													2.08277	4.3247
2.54281	1.83546													2.18115	4.03941													3.26401	3.50767													3.34234	4.1346
1.94694	3.74923													4.86891	4.2343													3.39612	3.15661													3.0429	4.70568
3.71798	3.93184													4.75159	4.74449													2.42686	3.44909													3.43728	3.2853
3.65068	4.19593													3.69009	2.06186													3.10117	3.25303													3.65393	3.65533
4.68315	4.14274													2.93662	4.22775													3.07341	3.68488													3.63815	3.85298
2.92059	4.17782													4.3932	3.21941													3.57703	2.97282													3.44249	3.10385
1.97593	2.52706													2.26687	3.96182													2.68479	2.65024													2.89961	3.9336
2.45907	1.91195													2.46101	4.69926													3.88247	2.99982													3.58214	4.18617
4.78205	4.51098													4.2343	3.71218													2.61094	1.90073													4.54816	3.77241
3.15783	3.5864													4.83751	4.09009													3.7516	1.81287													2.87379	3.3316
3.48181	3.56618													3.54823	2.99268													2.32314	4.77699													4.8358	3.2357
1.90468	2.40912													2.79966	4.16554													2.47953	3.02297													3.56435	3.73703
3.90959	3.35127													2.34912	4.26523													3.05505	3.48221													2.34345	4.23027
2.73349	4.40039													4.84212	3.97803													2.25192	2.32438													2.48406	2.80998
4.26323	3.09796													2.87199	4.34697													2.17042	2.80059													4.35311	3.46922
3.81851	4.09769													3.65968	3.62267													2.21197	3.22608													4.03052	4.10845
3.0577	4.29986													3.45931	2.6334													3.57703	2.89474													3.83997	3.91049
2.63683	1.79949													1.76376	3.63798													2.68479	3.57497													3.86047	3.64353
2.50929	2.28708													4.16815	3.95345													3.88247	3.20014													2.76276	5.13103
2.52947	4.04952													3.46271	2.33467													2.61094	3.36325													4.60306	4.40999
2.52947	1.41668													3.04196	2.70814													3.7516	3.18099													3.55561	4.92785
2.87988	2.95816													2.74227	4.76998													2.32314	3.2615													2.74522	3.39083
2.91564	3.32645													3.01804	4.63509													2.47953	3.11504													3.47784	4.44293
3.32014	2.48098													4.6753	3.80232													3.05505	2.73059													2.54217	3.46321
3.34935	3.1619													3.74998	4.55396													2.25192	3.85356													3.05284	3.92622
2.18934	2.92557													3.55936	3.93072													2.17042	3.07744													2.92779	3.68543
4.13218	3.81629													2.62577	4.1134													2.21197	2.31463													3.62181	4.45214
2.66282	2.58606													3.32702	3.13031													2.60887	3.37174													3.69872	3.98506
1.58319	1.96567													2.93747	4.2934													3.96893	3.27405													3.69715	3.70698
3.08431	3.20172													3.54563	3.14678													2.61243	2.851													4.77169	2.86357
1.92805	3.91942													3.36111	4.31367													3.88214	2.75224													2.11142	3.62041
2.02716	3.83427													3.09235	3.62648													3.45849	3.05253													4.10082	2.41062
1.86371	3.12013													3.34153	3.78422													3.84997	2.98137													4.10082	5.04571
3.98595	3.58577													2.19736	3.4685													2.32731	2.23449													4.4188	1.9629
2.28857	2.93594													3.39312	3.63595													2.32731	4.77809													2.903	4.57819
3.19509	2.89518													3.28867	3.30852													3.31341	3.76228													2.70252	4.39961
2.1734	3.58734													2.15696	3.64334													3.59676	4.76223													4.18635	4.36551
2.47997	3.23911													2.4944	2.98985													3.93803	3.41146													4.07806	3.82423
2.71189	2.62021													2.84261	3.38459													2.19175	2.59165													4.00271	3.73497
2.83818	3.50408													2.59611	4.79907													3.41014	2.14303													3.80863	3.79859
3.51003	3.13707													2.80079	3.59573													2.51147	2.14303													2.5233	3.71476
4.90055	3.43521													3.2914	2.95966													2.51147	3.85206													2.04571	2.39784
3.38014	2.53535													2.87918	3.21499													2.51147	2.44122													3.33521	3.54852
3.43909	3.10437													2.1563	4.46777													2.51147	2.85257													2.91005	2.90871
3.12107	2.64938													4.57062	3.67796													3.11781	1.81862													4.26491	2.47225
2.94744	3.40192													4.1173	4.31743													4.00978	2.57019													3.13622	1.78712
3.00568	4.14678													2.81632	2.70208													3.74414	1.89236													2.2368	3.73162
2.5888	4.01898													2.49041	4.52371													3.08081	3.12267													2.04179	3.82534
2.63929	3.76255													4.62657	3.40415													2.50767	2.96136													2.93767	2.21872
3.09392	4.17291													3.64984	3.46068													3.61613	3.01036													3.03034	4.67092
1.81524	2.99284													2.41358	3.33148													3.57781	2.23088													3.52541	2.9671
2.64333	4.03297													3.27477	3.22133													3.98012	3.38651													4.22223	4.72428
2.24877	3.8426													2.89223	3.59394													3.71521	4.5562													3.58471	3.81916
3.33458	4.14048													3.6683	3.71503													2.69784	4.74671													2.69518	4.0644
2.75219	2.2607													3.66498	3.51798													2.84914	4.1638													2.41831	3.21933
2.47439	2.87599													3.88083	4.38879													2.74086	4.1638													2.4188	2.62259
2.60933	2.59377													3.41957	3.6151													3.83853	3.7503													3.2287	2.31597
2.85665	3.91502													3.3	2.10334													3.19702	2.97655													3.00047	3.02288
2.44531	3.35163													3.8933	3.911													4.1152	2.66525													3.28579	1.42416
3.46747	3.72758													3.16736	4.7095													2.31337	2.26994													2.9035	4.36832
2.20207	2.77882													2.95144	3.89794													3.95039	4.31851													3.4029	2.60861
3.62745	3.47041													2.76686	2.86121													2.40915	3.6459													3.7172	3.92805
3.06614	2.97144													3.04655	4.02883													3.76149	4.60615													3.36503	3.89154
3.30739	3.4686													2.48337	4.12988													3.31411	2.27543													3.16672	3.92889
3.16993	3.18699													2.86884	3.63767													4.78547	2.96568													3.70102	3.67308
3.1055	2.8728													3.8112	2.7843													3.58401	3.71629													2.76113	3.9311
3.73205	2.80835													2.21641	3.22983													4.18242	4.29874													3.54562	1.59684
2.13445	2.80835													4.18984	2.05095													3.06354	3.6728													3.44842	3.74969
3.23154	2.80835													2.32402	2.52616													2.03955	2.86423													2.45688	3.36793
2.01229	3.41219													3.77323	3.49164													3.41027	3.03515													2.54349	3.87069
2.73259	3.61736													3.03199	3.4503													3.05051	2.5508													2.85705	4.07366
2.77421	3.25464													2.99817	3.6758													3.13908	3.66524														1.83656
3.00768	3.93882													2.59544	1.77509													4.21296	3.61531														4.68956
2.49727	3.52917													2.75135	3.30785													3.88168	3.72937														2.35861
3.25202	4.03593													2.66739	3.47456													3.69933	4.38611														2.98203
2.82219	3.13492													3.36632	3.53332													2.29722	3.99987														2.05732
3.0689	2.15034													2.69144	2.62333													4.33286	3.15732														3.8321
1.99329	2.15034													2.41534	2.31479													3.21182	4.16729														3.20252
2.51672	1.86974													4.32302	2.44651													3.17518	3.35272														3.82207
2.12964	3.30595													2.17193	2.29941													2.94337	2.56818														3.43017
3.78236	2.75844													2.32205	2.15538													3.39595	2.94216														2.87905
3.23408	3.12597													2.32071	3.73679													3.48016	2.5812														3.27821
2.37927	2.68867													2.83734	3.16937													3.52454	3.18238														3.13402
2.06727	3.02637													2.53104	1.90025													2.72391	3.06629														3.67854
2.41217	2.45749													2.47552	2.77225													3.2956	3.49224														3.52584
2.68108	3.5005													2.96808	3.6254													4.05402	3.52061
2.79975	3.62331													2.38979	3.92202													3.35782	3.72524
2.21179	3.11163													2.33917	4.19518													2.19272	2.90098
2.6454	2.60431													2.94459	3.59612													2.58327	2.90098
2.64839	2.06541													2.45446	2.76261													2.56021	2.90098
3.36279	2.11436													2.28465	2.45126													3.33354	4.09041
3.36279	2.19282													2.28155	3.08242													3.43538	5.533
3.36279	2.88632													3.31874	2.9962													2.34657	3.47314
2.60236	2.69568													3.39965	4.19681													3.18059	3.83636
2.56913	2.77945													2.85721	2.19631													3.68572	3.69124
2.56913	3.9351													2.92457	4.64404													3.00454	3.58381
2.56913	3.26634													2.9116	2.74443													2.84747	2.96533
3.3686	3.26634													3.21683	2.74443														3.77047
3.15107	2.90999													2.79992	3.61659														3.286
3.39969	2.59705													3.42672	4.35985														3.01711
2.50116	2.59705													2.20482	2.48659														3.8301
1.97352	2.29071													4.44111	3.44954														2.97946
2.69991	3.51038													2.58745	3.76827														3.87047
1.94948	2.21168													3.19742	3.18672														2.78761
3.02556	3.42279													3.5014	2.78492														4.13863
2.81797	2.23117													3.21717	3.11086														4.38846
3.91497	2.4173													4.46071	2.20255														4.09726
2.7043	2.75117													3.54447	3.60299														2.3166
4.59663	1.75347													2.56488	4.00497														4.38607
2.39807	2.05855													3.01518	4.55143														3.37018
3.77724	2.16578													2.64709	3.51755														4.2361
2.05605	3.40073													4.28675	4.20611														3.98542
2.66519	3.04733													3.48507	3.39472														3.38847
2.3251	2.06383													3.4133	2.66575														3.67911
1.92555	2.56621													3.4133	4.1														3.40497
2.12143	3.78621													4.03178	1.94178														3.84151
1.88982	3.59728													2.57034	3.48232														3.89154
2.36836	2.45924													3.05272	3.55235														3.52185
3.66755	1.48899													2.92368	3.5328														3.86418
2.22335	2.14892													2.58546	4.50968														3.57849
3.30077	3.17984													2.96474	4.94984														3.88794
2.50237	3.65665													2.60059	4.09003														3.8723
3.20989	2.20944													5.07494	2.97066														3.5153
3.38342	2.85208													2.34828	2.97066														2.81225
3.30599	2.91807													2.98421	2.34474														3.30944
2.31653	2.79962													2.92459	4.56169														3.46634
3.89738	3.979													2.71846	2.8583														4.03925
4.62008	2.85811													3.94071	3.77118														3.75913
3.58089	2.1466													3.73389	3.77118														3.52169
1.99859	2.1466													3.9763	3.5338														5.15907
1.99859	4.13097													3.51837	2.35795														4.39819
2.26449	3.47941													2.16762	3.60457														3.81403
3.46459	1.57702													3.12011	2.44867														3.49176
3.69886	3.61607													2.45013	3.69535														2.36346
3.4075	3.23237													2.75947	3.47018														4.08466
2.86931	3.55015													3.13316	3.09751														4.49934
2.74954	2.03847													3.13604	3.14096														4.37257
2.17805	2.03847													2.55805	3.60333														2.91661
3.11804	3.95098													3.36334	3.43868														2.87916
2.33475	3.93285													2.73142	4.10365														2.72855
2.11754	3.40369													2.46574	2.93382														2.39982
3.47108	2.63832														2.19183														3.93736
3.43574	4.1972														3.08559														1.85984
3.61913	3.81658														2.36601														3.35688
3.22008	3.14746														3.35783														2.95563
3.14904	2.8061														3.66331
2.05809	3.48193														3.97752
3.73512	2.57511														3.18253
3.29936	2.89649														3.19815
3.29936	4.21619														4.40724
3.29936	2.76291														2.96338
2.52571	4.3767														2.9398
3.48793	3.11474														3.2433
2.63724	2.76586														2.95613
3.4066	2.27723														2.95613
3.63429	2.31348														2.95613
2.3701	3.53707														3.4685
3.81499	2.0309														2.99167
3.97172	3.72448
2.7231	2.26988
2.74103	2.43987
1.93275	3.51371
2.86774	1.95707
2.62895	3.85441
4.31247	3.42667
3.68648	4.04255
3.88556	2.99696
4.03146	3.74741
3.60949	3.48032
3.60966	3.83178
3.68592	3.40238
2.05995	4.28185
3.97737	3.85348
4.00053	3.61363
3.70926	4.25891
2.34491	3.9127
3.06859	3.61746
3.0807	3.04395
3.43868	3.43846
4.07047	3.84917
2.7197	2.34923
2.01614	3.55052
2.15353	3.24055
2.97233	3.61011
2.51442	2.96835
4.53636	3.0015
4.87372	3.20238
3.033	2.93467
2.89826	3.75588
2.65543	2.75647
3.18863	3.71728
3.45841	2.22275
4.1531	1.78663
2.3768	3.85543
3.28505	3.63445
	3.146
	2.59639
	2.98467
	3.44508
	2.68592
	2.7367
	2.36132
	3.49241
	2.28135
	2.54307
	3.20692
	2.4708
	3.05562
	4.04744
	3.54407
	3.55759
	2.88858
	4.41079
	2.24509
	3.56961
	2.80865
	3.88278
	2.42957
	2.95773
	3.44925
	3.65552
	3.78407
	3.15679
	2.86184
	2.05699
	3.47813
	3.1879
	2.88065
	3.14637
	3.14637
	4.09454
	4.10477
	3.61442
	4.5638
	3.04385
	2.95845
	2.33282
