# Supplementary material for: Microglial trogocytosis and the complement system regulate axonal pruning in vivo
Source: eLife. 2021 Mar 16;10:e62167. doi: 10.7554/eLife.62167 (PMC7963485; doi:10.7554/eLife.62167)
Supplement: Figure 3—source data 1. [file elife-62167-fig3-data1.xlsx]

## Sheet: Sheet1
Fig. 3C
Microglial green fluorescence
No labeled axons
Day 4	18.8969	27.9831	36.7497	19.5192	25.3302	23.6986	16.9304	15.1302	18.494	28.6901	19.4903	28.1422	23.7698	24.6283	38.3256	34.7628
Day 5	21.3088	39.538	40.1771	16.7045	25.7191	36.4577	28.9286	17.2833	18.4282	19.7354	27.1591	29.2702	35.8269	22.082	30.9234	36.8608
1-4 labeled axons
Day 4	18.2091	39.7344	48.7408	25.8345	34.1405	25.4143	19.1497	25.4214	35.4767	34.1335	31.838	18.3235
Day 5	29.7911	51.1191	47.3982	51.8609	45.6405	42.0965	23.6835	39.7288	36.5316	48.8408	29.2898	28.6154
5-8 labeled axons
Day 4	19.3483	19.0311	19.8414	20.5395	20.5395	28.3791	35.6446	32.0662	36.953	35.1509	24.5672
Day 5	25.2658	37.7309	29.9223	21.774	33.1519	47.9701	36.3015	35.2189	45.6058	42.864	46.3104
9-12 labeled axons
Day 4	57.516	41.2721	30.2176	43.0565	40.1805	24.5146	27.546	24.0982
Day 5	86.0806	72.5099	46.5224	62.8003	43.6222	42.0338	37.0039	33.4716
Fig. 3D	pHtdGFP				Fig. 3—fig supp 2A
# labeled axons	Day 4	Day 5			# labeled axons	change
0	18.8969	21.3088			0	2.41192
0	27.9831	39.538			0	11.555
0	36.7497	40.1771			0	3.42742
0	19.5192	16.7045			0	-2.81471
0	25.3302	25.7191			0	0.38885
0	23.6986	36.4577			0	12.7591
0	16.9304	28.9286			0	11.9982
0	15.1302	17.2833			0	2.15302
0	18.494	18.4282			0	-0.06582
0	28.6901	19.7354			0	-8.95469
0	19.4903	27.1591			0	7.66878
0	28.1422	29.2702			0	1.12803
0	23.7698	35.8269			0	12.0571
0	24.6283	22.082			0	-2.54635
0	38.3256	30.9234			0	-7.40222
0	34.7628	36.8608			0	2.09793
1	48.7408	47.3982			1	-1.34265
1	34.1405	45.6405			1	11.5
1	25.4143	41.105			1	15.6906
2	18.2091	29.7911			2	11.582
2	25.8345	51.8609			2	26.0264
2	25.4214	39.7288			2	14.3074
2	31.838	29.2898			2	-2.54825
2	18.3235	28.6154			2	10.2918
3	34.1335	48.8408			3	14.7073
4	39.7344	51.1191			4	11.3847
4	19.1497	23.6835			4	4.53377
4	35.4767	36.5316			4	1.05499
5	19.3483	25.2658			5	5.91748
5	24.5672	46.3104			5	21.7432
6	19.0311	37.7309			6	18.6998
6	28.3791	47.9701			6	19.591
6	32.0662	35.2189			6	3.15266
6	36.953	45.6058			6	8.65284
7	35.6446	36.3015			7	0.65686
8	19.8414	29.9223			8	10.0809
8	20.5395	21.774			8	1.23452
8	20.5395	33.1519			8	12.6124
8	35.1509	42.864			8	7.71308
9	57.516	86.0806			9	28.5645
9	27.546	37.0039			9	9.4579
10	30.2176	46.5224			10	16.3048
10	40.1805	43.6222			10	3.44169
10	24.0982	33.4716			10	9.3734
12	41.2721	72.5099			12	31.2378
12	43.0565	62.8003			12	19.7439
12	24.5146	42.0338			12	17.5191
Fig. 3F	SYN-pHtdGFP				Fig. 3—fig supp 2B
# labeled axons	Day 4	Day 5			# labeled axons	change
0	12.5419	16.0543			0	3.5124
0	13.3866	15.9617			0	2.57503
0	20.3846	21.1909			0	0.80627
0	15.1434	15.5493			0	0.40597
0	17.3596	24.5016			0	7.14199
0	15.1268	15.5249			0	0.39815
0	14.6794	15.1268			0	0.44734
0	15.8414	19.7912			0	3.94984
0	19.8336	20.5567			0	0.72308
0	13.7966	16.6197			0	2.8231
0	37.9101	31.4891			0	-6.421
0	26.9496	24.3243			0	-2.62535
1	10.9255	20.1565			1	9.23099
1	8.21509	12.7867			1	4.57161
1	12.2795	23.5081			1	11.2287
1	15.2555	19.2103			1	3.95484
1	17.0721	16.0957			1	-0.97643
2	29.2876	38.934			2	9.64634
2	17.6693	24.6771			2	7.00788
2	23.2837	23.6461			2	0.36236
2	16.9137	15.6643			2	-1.24942
2	34.1648	21.5968			2	-12.5679
3	9.91584	15.4414			3	5.5256
3	20.4136	30.4203			3	10.0067
3	10.5575	9.81149			3	-0.745989
3	12.0504	10.494			3	-1.5564
3	10.6119	8.95011			3	-1.66182
3	16.4235	30.3315			3	13.908
3	20.453	22.2497			3	1.79671
4	10.7629	19.4932			4	8.73031
4	20.668	23.1232			4	2.45527
4	21.5033	29.9798			4	8.47651
4	24.4267	29.2163			4	4.78968
4	17.6739	19.1573			4	1.48332
4	26.4352	21.4149			4	-5.02029
5	13.7911	16.1849			5	2.39379
5	16.2888	27.91			5	11.6212
5	11.0722	26.4354			5	15.3632
5	20.6919	26.7146			5	6.02269
5	25.0874	29.3151			5	4.22778
6	11.8291	16.306			6	4.477
6	14.2882	18.5007			6	4.21246
6	13.2357	20.8673			6	7.63154
6	22.1277	25.4358			6	3.30814
7	12.38	34.0988			7	21.7187
7	12.7846	20.5226			7	7.73803
7	15.4503	19.9282			7	4.47786
7	14.6603	28.0671			7	13.4067
7	40.855	42.9103			7	2.05529
7	20.2403	29.13			7	8.88971
7	32.5129	25.1219			7	-7.39102
7	18.3299	20.3617			7	2.03177
9	29.6435	40.0823			9	10.4388
9	19.7819	28.7411			9	8.95923
9	16.3509	23.5512			9	7.20031
10	21.6014	30.235			10	8.63354
12	9.73704	14.1645			12	4.42749
