# Supplementary material for: Microglial trogocytosis and the complement system regulate axonal pruning in vivo
Source: eLife. 2021 Mar 16;10:e62167. doi: 10.7554/eLife.62167 (PMC7963485; doi:10.7554/eLife.62167)
Supplement: Figure 4—source data 1. [file elife-62167-fig4-data1.xlsx]

## Sheet: Sheet1
Fig. 4B
# microglia
	Control								10 µM PLX5622
Day 2	3	5	8	5	8	13	5	6	1	3	1	2	4	4	1	1
Day 3	20	26	31	15	13	24	7	18	2	3	0	4	11	4	3	3
Day 4	22	25	36	29	28	40	14	28	11	11	2	2	16	16	1	3
Day 5	27	38	40	30	36	47			7	25		1	23	12	1	1
Fig. 4C
average process number
	Control								10 µM PLX5622
Day 2	0	1.6	2	1.2	1.625	2.15385	1.6	2.16667	0	0.333333	0	0.5	0.25	1	0	0
Day 3	1.45	2.15385	2.12903	2.06667	2	2.29167	2.57143	2.05556	1	1.33333	0	2	1.45454	1	0.333333	0.666667
Day 4	2.36364	2.12	2.44444	1.82759	2.42857	2.35	1.5	2.32143	2.18182	2.09091	1	3	1.875	2	0	0.666667
Day 5	2.51852	1.81579	2.775	2.16667	2.58333	2.42553			1.57143	2.08		1	2.13043	2.08333	0	0
Fig. 4E
axon arbor length (µm)
	Control							10 µM PLX5622
Day 2	383	243.5	237.2	1052.4	156.1	406	596.6	382.6	373.7	115.1	445.8	563.2	324.8	1234	319.1	458.2	394.4	344.4	875.7	702	634.6	748.5	88.6	243.6	510.9	479.9
Day 3	491.5	474.6	404.5	1146.3	294.5	379.2	758	500.2	404.4	200	690.3	459.3	477.1	1402.2	484.5	733.7	559.7	542.9	1303.8	701.8	657.7	850.7	344.2	476.9	954.6	560.7
Day 4	621	561.6	579.3	1297.7	423.7	521.5	1081.1	807.9	452.3	312.7	1009.7	681.9	738.2	1446.6	683.4	1074.8	649.6	877	1489.7	1211.6	839.2	926.2	568.3	636.6	1104.4	531
Day 5	664	617.7	735.4	1482	528.5	655.4	1241.5	970.4	412.4	466.3	1018.8	757.1	971.2	1381.6	706.3	1282.8	664.6	1141.3	1488.2	969.9	934.7	1056.7	721	795.9	1349.9	573.3
Fig. 4F
# of branches
	Control							10 µM PLX5622
Day 2	19	7	14	42	3	18	33	19	31	7	27	30	21	54	23	34	30	18	46	33	28	28	6	14	27	35
Day 3	22	16	16	44	9	24	37	28	28	15	48	22	31	51	35	60	55	54	88	38	23	27	35	33	61	39
Day 4	34	15	30	46	22	28	41	45	30	23	67	37	44	67	40	90	61	62	90	53	32	22	58	39	56	36
Day 5	35	20	33	57	33	32	53	55	28	28	112	45	64	68	48	89	56	69	74	49	28	29	56	46	74	33
