# Supplementary material for: Microglial trogocytosis and the complement system regulate axonal pruning in vivo
Source: eLife. 2021 Mar 16;10:e62167. doi: 10.7554/eLife.62167 (PMC7963485; doi:10.7554/eLife.62167)
Supplement: Figure 5—source data 1. [file elife-62167-fig5-data1.xlsx]

## Sheet: Sheet1
Fig. 5E	dark looming stimuli
instantaneous velocity (mm/s)
Time	Vehicle Control								10 µM PLX5622
-3	1.4	1.6	5.23	0.93	1.66	5.42	5.39	17.1	0.16	14.47	0.04	12.29	10.46	13.15	12.09	5.61
-2.9	1.32	1.56	5.64	0.9	1.57	5.95	5.91	16.34	0.25	14.96	0.13	12.22	12.63	13.43	12.63	6.42
-2.8	1.27	1.6	5.87	0.86	1.36	6.55	6.53	15.5	0.17	14.92	0.04	12.18	15.31	14.03	13.22	6.22
-2.7	1.23	1.25	6.59	0.77	1.25	6.88	7.55	14.89	0.2	14.59	0.08	9.09	17.52	14.49	13.46	6
-2.6	1.29	1.33	6.91	0.94	1.24	7.13	9.25	15.25	0.17	14.25	0.12	8.5	17.18	15.12	13.63	6.15
-2.5	1.35	1.06	6.97	0.96	1.32	7.17	10.5	15.32	0.04	13.93	0.08	8.58	16.17	15.33	13.52	5.75
-2.4	0.8	0.95	7.41	1.16	1.36	7.34	11.54	15.82	0.13	13.78	0.04	8.61	14.76	15.75	13.49	5.75
-2.3	0.96	1.18	7.33	1.21	1.31	7.35	10.73	15.34	0.16	13.46	0.04	8.56	13.96	15.89	13.67	5.37
-2.2	0.94	0.92	7.2	1.67	1.24	7.49	10.08	15.51	0.12	13.26	0.08	8.33	14.15	15.93	13.67	5.39
-2.1	0.82	0.89	6.97	2.24	1.32	7.3	9.45	15.84	0.16	12.7	0.04	8.14	14.25	15.69	13.04	5.09
-2	0.83	0.82	7.22	3.73	1.31	7.01	8.88	15.67	0.12	12.19	0.04	7.43	13.54	15.5	12.86	4.67
-1.9	0.71	1.12	7.93	5.21	1.29	6.83	8.16	15.13	0.08	12.26	0.12	6.49	11.78	15.08	12.39	4.16
-1.8	0.73	1.2	8.21	6.54	1.25	6.64	6.86	14.8	0.08	12.25	0.08	7.08	10.21	15.02	11.87	3.89
-1.7	0.61	0.71	8.2	7.57	1.26	6.1	6.15	13.81	0.16	11.92	0.04	7.25	9.5	14.71	11.14	4.32
-1.6	0.7	0.76	7.94	8.74	1.36	5.39	7.82	13.12	0.08	11.38	0.05	7.71	9.19	14.28	10.66	4.78
-1.5	0.68	0.81	7.69	8.98	1.46	4.98	8.69	12.68	0.16	10.48	0.08	8.17	9.27	14.46	10.29	5.3
-1.4	0.8	0.72	7	8.47	1.73	4.3	8.65	13.25	0.08	10.2	0.04	8.55	9.38	14.47	10.83	4.85
-1.3	0.71	0.7	6.16	7.86	1.59	3.84	9.25	14.27	0.04	10.39	0.08	8.42	9.88	14.87	11.53	4.78
-1.2	0.65	0.71	5.58	7.13	1.63	3.37	10.36	15.08	0.04	11.27	0.08	7.63	10.15	15.42	12.3	3.25
-1.1	0.87	0.64	5.02	6.29	1.53	2.95	11.11	15.82	0.12	11.73	0.04	6.73	9.86	15.88	12.65	1.67
-1	0.76	0.64	4.74	5.18	1.59	2.28	10.81	16.76	0.2	11.94	0.16	6.01	9.55	16.54	12.8	1.32
-0.9	0.85	0.76	4.68	4.67	1.32	3.06	10.66	17.72	0.12	11.38	0.08	6.19	9.2	16.68	12.81	3.92
-0.8	0.87	0.76	4.69	4.26	1.12	4.75	10.01	17.72	0.16	10.79	0.08	7.02	8.72	17.14	12.89	5.51
-0.7	0.96	0.67	4.82	4.2	1.18	5.81	8.58	16.51	0.12	9.89	0.04	7.58	8.51	17.93	12.54	6.41
-0.6	1.07	0.8	5.31	3.96	1.29	6.46	7.25	16.31	0.2	9	0.04	8.04	8.43	19.09	12.39	6.76
-0.5	0.88	0.85	5.48	3.98	1.59	7.36	6.06	16.32	0.08	9.61	0.12	8.24	7.84	19.82	12.49	6.92
-0.4	1.01	0.72	6.12	3.8	1.89	8.75	6.69	16.32	0.16	10.82	0.12	8.43	7.23	20.7	12.83	5.89
-0.3	0.95	0.66	6.67	3.94	2.15	9.8	8.44	16.43	0.2	11.89	0.12	8.42	6.74	21.49	12.81	5.59
-0.2	0.93	0.72	7.6	3.73	2.2	10.23	9.48	17.4	0.08	11.78	0.08	8.32	6.2	22.42	12.96	5.57
-0.1	0.93	0.77	8.64	3.62	2.11	10.23	10.47	18.1	0.12	10.89	0.04	8.08	5.2	22.99	12.89	5.99
0	1.06	0.9	10.02	3.41	2.27	10.06	10.91	18.54	0.08	9.34	0.04	7.63	4.48	23.12	13.06	5.97
0.1	1.37	0.79	10.78	2.8	1.93	9.8	11.32	18.89	0.16	8.31	0.08	7.22	4.15	22.95	12.76	5.86
0.2	1.54	0.7	11.15	2.61	1.99	9.22	11.01	19.72	0.12	8.55	0.08	6.52	4.14	22.57	12.52	5.44
0.3	1.9	0.78	11.73	2.17	2.03	7.61	11	21.15	0.12	9.19	0.12	6.56	3.8	22.06	12.62	3.95
0.4	1.97	1.14	12.08	1.95	2.36	8.57	11.63	22.68	0.08	10.22	0.25	7.65	3.41	21.4	12.72	2.16
0.5	2.3	14.47	17.23	2.12	6.98	20.14	22.88	32.25	0.63	11.58	0.55	9.87	4.75	21.38	14.47	2.42
0.6	5.02	41.05	21.14	5.04	17.61	41.8	43.84	51.57	1.47	14	0.97	13.68	9.83	20.8	18.22	6.22
0.7	10.2	66.75	30.32	8.36	29.86	61.47	57.9	66.32	1.61	13.82	1	17.11	14.97	20	20.5	9.24
0.8	12.83	86.93	34.92	11.68	42.28	76.38	67.99	74.58	1.54	15.23	0.95	18.52	15.06	19.27	21.58	10.65
0.9	15.71	102.26	37.62	15.76	48.99	85.97	74.28	75.32	1.56	15.54	0.91	17.82	15.02	18.71	21.18	12.56
1	18.52	112.51	38.13	19.43	52.34	92.4	77.84	73.98	1.43	14.86	0.91	17.16	14.67	18.15	20.66	13.98
1.1	20.44	114.11	35.08	21.97	53.86	91.23	75.31	70.22	1.24	13.1	0.62	15.68	14.4	17.16	20.68	14.86
1.2	19.21	106.23	28.38	23.15	49.06	75.8	62.31	61.71	0.44	12.04	0.12	14.15	14.16	16.26	22.77	15.16
1.3	15.84	95.26	20.22	21.29	41.66	64.64	50.87	54.11	0.08	12.29	0.12	16.27	15.91	15.67	23.55	14.79
1.4	13.41	87.12	17.99	18.8	39.29	57.9	41.11	45.59	0.04	12.85	0.16	17.67	13.96	15.31	21.86	15.15
1.5	10.85	82.94	15.28	16.31	36.82	49.92	32.1	38.98	1.42	12.41	0.8	19.33	11.34	14.7	17.83	15.02
1.6	12.15	76.43	12.5	14.49	35.43	44.42	24.86	34.62	1.44	11.32	0.91	21.21	8.84	14.52	15.78	14.04
1.7	15.04	67.7	11.4	13.61	35.07	39.18	19.2	32.01	1.71	11.1	0.94	21.92	8.82	14.31	13.68	12.78
1.8	16.8	57.63	10.34	12.87	33.34	34.47	14.93	30.55	1.59	12.53	0.96	20.95	10.03	14.61	11.49	10.88
1.9	17.26	49.66	9.89	12.42	30.48	29.02	11.57	27.58	1.68	12.7	0.95	19.06	11.36	15.26	9.82	9.03
2	16.6	43.3	9.92	12.08	27.78	24.78	9.03	26.01	1.64	11.76	0.94	17.71	11	15.78	8.71	6.95
2.1	15.03	37.88	11.36	11.62	25.39	22.61	7.78	25.19	0.24	11.67	0.09	16.47	7.75	16.49	8.38	7.31
2.2	13.37	32.09	12.11	10.82	23.04	20.3	6.4	24.62	0.08	11.12	0.05	17.66	4.63	16.87	8.47	9.96
2.3	11.94	27.39	12.06	9.82	19.99	18.86	5.83	24.17	0.09	10.19	0.08	16.89	5.92	17.52	9.03	12.95
2.4	11.19	22.4	12.58	8.98	17.13	17.22	5.12	23.46	0.08	9	0.04	16.07	6.71	17.95	9.94	15.48
2.5	10.81	18.32	12.72	7.92	14.89	15.86	4.81	22.55	0.08	8.95	0.08	15.7	6.54	17.19	10.89	18.02
2.6	10.09	15.55	13.02	7.19	13.73	15.6	3.75	20.98	0.12	9.01	0.04	15.32	6.7	16.74	11.46	18.4
2.7	9.06	13.09	12.84	6.53	12.5	14.79	4.47	19.12	0.16	10.05	0.08	15.15	7.29	16.12	11.95	17.33
2.8	8.33	11.96	12.7	5.99	11.28	13.61	4.52	17.22	0	11.96	0.12	14.1	7.27	15.24	12.34	16.42
2.9	7.59	13.52	12.56	5.36	9.93	13.21	4.81	15.55	0.16	12.56	0.12	11.88	6.99	14.62	12.9	15.44
3	7.31	17.3	12.98	4.88	8.77	12.12	6.54	14.43	0.16	13.71	0.12	12.91	5.81	14.52	12.79	13.57
Fig. 5F	dark looming stimuli
distance traveled (mm)
	Vehicle Control								10 µM PLX5622
Before	2.771	2.753	19.82	12.47	4.479	19.1	26.41	47.09	0.392	35.98	0.222	24.6	32.38	49.83	37.68	15.35
After	33.06	140.9	51.96	31.73	74.26	108.8	78.72	108.7	2.113	34.94	1.312	45.56	27.46	52.84	44.17	34.22
Fig. 5G	dark looming stimuli
escape probability (%)
	Vehicle Control								10 µM PLX5622
	30	100	62.5	70	90	100	100	88.8889	0	14.2857	0	33.3333	20	0	66.6667	11.1111
Fig. 5I	bright looming stimuli
instantaneous velocity (mm/s)
Time	Vehicle Control								10 µM PLX5622
-3	0.21	9.85	11.11	28.15	9.82	23.32	3.53	23.11	0.08	5.15	6.59	4.87	11.37	19.46	19.65	13.62
-2.9	0.2	9.28	10.53	25.67	9.62	23.4	3.53	24.32	0.04	4.97	6.62	4.58	13.58	19.58	18.96	13.52
-2.8	0.16	9.45	9.72	23.84	9.61	24.13	3.55	24.14	0.12	4.78	7.15	4.48	14.79	19.13	18.21	13.25
-2.7	0.12	9.21	8.86	21.8	9.64	24.47	3.48	22.93	0.15	4.22	7.98	4.5	15.37	18.22	17.62	12.32
-2.6	0.16	10.8	8.41	20.29	9.97	25.06	3.33	20.8	0.13	3.75	7.91	4.44	15.48	16.83	17.01	11.85
-2.5	0.15	11.61	8.02	18.49	11.35	25.11	3.14	18.57	0.15	3.07	8.05	4.62	16.3	14.75	17.03	11.72
-2.4	0.23	13.09	8.35	17.07	12.51	24.95	2.84	16.72	0.07	3.22	8.26	4.72	16.9	13.93	16.9	11.43
-2.3	0.17	14.74	8.62	17.32	13.26	24.3	2.55	14.6	0.16	3.45	7.39	4.59	16.68	14.89	16.87	11.08
-2.2	0.12	15.77	9.06	17.94	14.06	23.33	2.3	14.14	0.19	3.47	5.7	4.24	16.99	15.4	16.4	10.66
-2.1	0.17	16.51	9.42	18.45	14.56	22.25	2.08	13.71	0.2	3.58	4.84	3.8	17.16	16.42	15.69	10.73
-2	0.13	16.15	9.74	19.16	15.31	20.84	1.86	13.81	0.2	3.91	5.45	3.27	16.99	16.85	14.41	11.03
-1.9	0.13	15.86	9.7	19.6	15.4	19.92	1.73	14.11	0.2	3.16	5.68	2.61	16.26	17.86	13.26	10.88
-1.8	0.12	15.52	9.32	20.5	15.53	18.42	1.5	14.87	0.2	1.99	5.42	1.86	14.76	18.06	12.5	10.88
-1.7	0.25	14.76	8.62	20.34	15.78	17.14	1.38	17.36	0.2	3.17	4.97	1.42	14.29	17.15	11.72	11.29
-1.6	0.2	13.43	7.82	20.56	15.62	17.42	1.3	20.31	0.2	4.65	5.72	1.15	13.78	16.08	11.4	11.68
-1.5	0.2	12.19	6.7	21.08	15.41	17.12	1.16	21.81	0.2	5.99	6.49	1	13.6	15.55	10.86	11.69
-1.4	0.25	11.2	5.87	21.11	15.22	16.87	0.96	22.69	0.19	7.1	7.02	0.92	13.24	15.06	8.92	11.82
-1.3	0.16	11.15	5.27	21.16	15.08	16.04	1.01	21.41	0.11	7.36	7.13	0.78	13.59	13.66	7.1	11.34
-1.2	0.2	12.83	4.84	21.02	15.01	14.9	1	19.88	0.08	7.12	7.36	0.66	13.83	12.59	6.14	11.45
-1.1	0.32	14.73	4.19	20.78	14.97	14.03	1.2	16.76	0.04	6.61	7.48	0.55	13.91	13.33	6.85	11.21
-1	0.25	16.95	4.05	20.06	14.91	15.43	1.25	12.88	0.12	6.19	7.01	0.41	13.92	15.3	8.26	11.09
-0.9	0.31	18.6	3.71	19.35	15.01	16.95	1.28	9.3	0.08	9.05	6.21	0.23	13.81	16.84	8.29	10.92
-0.8	0.32	19.22	3.52	18.28	14.75	17.84	1.35	6.8	0.08	11.66	5.96	0.17	13.45	17.58	7.07	11.21
-0.7	0.21	18.55	2.97	18.12	13.98	17.86	1.56	5.61	0.08	13.55	4.68	0.16	13.05	18.15	8.09	11.17
-0.6	0.25	17.96	2.58	18.17	13	17.94	1.72	4.8	0.12	15.57	3.41	0.25	12.91	18.51	9.25	10.68
-0.5	0.13	17.8	2.31	18.33	12	17.85	1.93	4.4	0.08	17.1	3.23	0.31	12.63	19.16	9.67	9.97
-0.4	0.08	18.26	2.06	18.1	11.04	17.36	2.13	4.26	0.04	17.95	5.15	0.39	12.14	19.99	9.9	9.66
-0.3	0.2	18.59	1.91	16.99	9.74	16.22	2.35	3.94	0	18.33	6.38	0.38	11.65	20.29	9.82	9.54
-0.2	0.25	19.52	1.85	16.07	8.51	14.33	2.7	3.76	0	18.16	7.27	0.36	11	20.28	10.68	9.44
-0.1	0.24	20.91	1.7	15.04	7.95	14.72	3.38	3.85	0.08	17.49	7.34	0.44	10.47	20.5	11.69	9.66
0	0.2	21.84	1.73	14.54	7.55	14.87	3.76	4.56	0.04	16.83	7.57	0.44	10.26	21.8	11.69	10.37
0.1	0.2	22.15	1.59	15.15	7.55	14.14	4.4	6.41	0.08	15.4	7.23	0.43	9.46	21.99	12.21	11.95
0.2	0.2	21.82	1.5	15.25	7.85	13.42	4.81	7.89	0.04	14.67	6.26	0.47	9.54	21.72	11.36	12.63
0.3	0.16	21.75	1.56	16.55	8.35	14.34	5.26	9.31	0.08	14	6.53	0.43	10.7	19.65	10.77	13.27
0.4	0.12	21.02	1.63	17.87	8.8	14.88	5.85	10.22	0.24	13.12	6.72	0.61	12.15	17.92	9.75	14.05
0.5	0.61	20.48	1.75	19.23	9.33	15.26	6.15	12.33	0.47	16.78	7.16	1.34	16.14	16.84	9.92	17.8
0.6	0.88	20.47	1.4	19.98	10.01	17.09	5.91	15.9	1.52	22.25	8.8	2.86	20.76	15.01	11.6	22.98
0.7	0.96	19.44	1.49	20.14	11.15	17.29	5.48	17.82	2.9	27.15	7.51	3.11	22.97	12.84	12.15	27.48
0.8	0.85	18.91	1.61	20.6	12.47	17.28	4.78	18.96	4.94	31.27	5.96	3.15	25.38	11.86	12.78	30.98
0.9	0.87	18.58	2.1	20.46	14.02	16.93	4.32	19.58	7.22	35.57	6.89	3.23	27.94	11.95	14.35	33.6
1	0.84	18.18	3.21	21.16	14.93	16.57	4.16	20.33	8.93	44.31	7.82	3.21	31.1	13.27	15.61	36.64
1.1	0.52	17.34	3.6	21.78	16.45	17.43	4.14	20.28	9.88	54.7	9.36	2.64	31.88	15.97	18.51	39.87
1.2	0.21	16.17	4.71	22.5	18.45	17.26	4.51	18.56	9.57	62.28	12.24	1.3	31.5	17.7	22.94	43.77
1.3	0.08	15.9	5.84	22.91	21.43	18.18	5.12	15.4	7.92	67.97	13.55	0.86	32.29	20.54	27.17	49.32
1.4	0.08	15.07	6.86	23.17	23.69	19.01	5.3	13.51	5.48	70.53	13.22	0.79	33.49	23.39	30.19	51.94
1.5	0.97	14.13	7.61	23.96	26.93	20.85	5.95	13.71	4.1	72.25	12.41	3.59	34.44	25.63	33.54	55.37
1.6	0.99	12.69	8.47	24.9	29.06	22.3	5.78	13.06	2.67	73.49	12.43	3.57	34.28	25.88	35.53	57.37
1.7	0.95	11.13	8.76	25.58	30.4	22.42	5.53	11.79	3.62	73.9	14.35	3.47	35	24.15	34.4	56.59
1.8	0.94	9.67	9.54	26.98	30.33	22.18	4.97	9.81	5.18	73.88	15.72	3.42	33.86	23.51	30.92	54.03
1.9	0.94	8.42	10.03	27.06	29.33	21.71	4.74	8.53	5.96	70.95	17.74	3.42	34.28	22.69	28.16	51.9
2	0.98	6.83	10.59	27.8	28.59	20.92	4.33	7.26	6.44	71.39	19.09	3.32	34.06	22.12	25.65	49.02
2.1	0.13	4.4	10.91	27.66	27.33	19.87	3.71	4.55	5.31	71.46	18.99	1.28	34.94	21.01	23.09	44.4
2.2	0.17	3.27	11.35	26.66	26.82	19.05	3.52	3.69	5.03	70.91	19.6	0.48	37.48	20.55	21	40.71
2.3	0.18	2.79	11.01	26.01	26.23	18.87	2.81	4.65	4.85	70.74	19.72	0.49	37.93	20.62	19.74	40.23
2.4	0.13	3.22	11.28	25.32	25.02	19.87	2.31	5.49	4.59	70.7	17.11	0.44	38.23	22.32	20.12	38.78
2.5	0.05	5.2	11.53	24.68	23.59	21.16	1.81	6.87	4.42	69.19	14.64	0.39	39.15	24.63	20.84	37.15
2.6	0	7.48	11.49	24.05	22.19	22.16	1.71	9.64	5.27	67.2	14.6	0.48	39.55	25.77	21.9	34.64
2.7	0.04	10.23	11.47	23.69	20.5	23.06	1.57	12.4	5.05	64.22	14.21	0.44	39.38	24.96	22.23	33.68
2.8	0.13	13.04	11.75	23.5	18.83	24.01	1.28	14.68	4.38	62.76	13.82	0.37	38.82	26.23	22.46	32.59
2.9	0.21	15.34	11.15	23.27	17.71	24.25	0.96	16.29	3.62	60.03	14.68	0.44	38.02	27.44	22.47	30.6
3	0.2	16.76	10.68	23.35	17.04	24.15	0.92	18.13	2.93	57.62	15.13	0.43	36.64	28.43	21.27	29.33
Fig. 5J	bright looming stimuli
distance traveled (mm)
	Vehicle Control								10 µM PLX5622
Before	0.5885	45.05	18.61	58.6	38.75	57.53	6.32	42.64	0.357	24.16	19.03	5.995	42.33	51.26	36.62	33.52
After	1.359	41.44	20.2	67.68	57.96	57.13	12.35	36.03	13.12	157	36.97	5.047	88.82	62.33	61.78	108.3
Fig. 5K	bright looming stimuli
escape probability (%)
	Vehicle Control								10 µM PLX5622
	0	0	22.2222	0	66.6667	25	0	22.2222	10	88.8889	22.2222	10	55.5556	50	100	100
Fig. 5—fig supp 1A		dark looming stimuli
escape distance (mm)
	Vehicle Control								10 µM PLX5622
	47.0333	79.93	33.72	21.4143	49.2444	57.64	46.2889	61.7375		91.4		44.1667	75.45		32.6333	71.7
Fig. 5—fig supp 1B		bright looming stimuli
escape distance (mm)
	Vehicle Control								10 µM PLX5622
			19.8		26.6833	23.3		36.9	56.5	73.0875	35.15	2.2	55.18	31.8667	25.9286	41.4286
Fig. 5—fig supp 1C		dark looming stimuli
maximum escape velocity (mm/s)
	Vehicle Control								10 µM PLX5622
	75.8667	123.28	68.48	38.2429	73.3556	98.22	91.1	108.463		31.3		55.6333	94.75		48.9167	107.8
Fig. 5—fig supp 1D		bright looming stimuli
maximum escape velocity (mm/s)
	Vehicle Control								10 µM PLX5622
			30.85		38.1667	31.5		63.9	93.3	96.5875	68.05	1.2	84.94	50.1667	36.6	67.7625
Fig. 5—fig supp 1E		dark looming stimuli
escape angle (°)
	Vehicle Control								10 µM PLX5622
	133.133	106.71	140.36	59.6429	112.2	121.01	125.589	94.4375		255.3		44.1	39.4		60.1333	0.2
Fig. 5—fig supp 1F		bright looming stimuli
escape angle (°)
	Vehicle Control								10 µM PLX5622
			20.4		71.3167	100.3		146.05	121.2	152.762	68.4	16.1	59.38	219.167	72.0667	76.025
