# Supplementary material for: Microglial trogocytosis and the complement system regulate axonal pruning in vivo
Source: eLife. 2021 Mar 16;10:e62167. doi: 10.7554/eLife.62167 (PMC7963485; doi:10.7554/eLife.62167)
Supplement: Figure 6—source data 1. [file elife-62167-fig6-data1.xlsx]

## Sheet: Sheet1
Fig. 6B
Log₂(CPM+1) Expression (Trimmed mean)
cluster label	C3	CD46	CD55	CFH	CFB	CR1	CR2	CFHR1	CFHR3	CFHR4	CFHR5
Exc L5-6 FEZF2 ANKRD20A1	0.00940572	6.46916	0.270188	0	0	0	0	0	0	0	0
Exc L5-6 THEMIS TMEM233	0	6.52759	0.0094852	0	0	0	0	0	0	0	0
Inh L1 LAMP5 NDNF	0	5.54645	0	0	0	0	0	0	0	0	0
Exc L6 FEZF2 CPZ	0	6.56918	1.62998	0	0	0	0	0	0	0	0
Astro L1 FGFR3 MT1G	0.0505079	0.09545	0	0	0	0	0	0	0	0	0
Exc L2-3 LINC00507 RPL9P17	0.00949155	6.27752	0	0	0	0	0	0	0	0	0
Exc L6 FEZF2 KRT17	0	6.56341	0.51776	0	0	0	0	0	0	0	0
Exc L3-4 RORB FOLH1B	0.0411131	6.25483	0.287129	0	0	0	0	0	0	0	0
Endo L2-5 CLDN5	0	3.95477	0	2.55761	0	0	0	0	0	0	0
Exc L5-6 RORB LINC00320	0.0173617	5.72543	0	0	0	0	0	0	0	0	0
Inh L3-6 PVALB MFI2	0	3.03622	0	0	0	0	0	0	0	0	0
Inh L1-4 VIP CHRNA2	0.0185642	2.828	0.030707	0	0	0	0	0	0	0	0
Exc L5-6 FEZF2 CYP26B1	0	7.05541	0.405992	0	0	0	0	0	0	0	0
Inh L1-6 PVALB SCUBE3	0.030898	3.35778	0.151044	0	0	0	0	0	0	0	0
Inh L5-6 PVALB STON2	0	6.30147	0.598356	0	0	0	0	0	0	0	0
Exc L3-5 RORB CMAHP	0	2.60694	0	0	0	0	0	0	0	0	0
Inh L4-6 SST MTHFD2P6	0.00229271	3.15175	0.110978	0	0	0	0	0	0	0	0
Exc L3-4 RORB RPS3P6	0	3.5597	0	0	0	0	0	0	0	0	0
Exc L6 THEMIS C6orf48	0.0137272	6.96761	0.0259102	0	0	0	0	0	0	0	0
Inh L1-3 VIP SSTR1	0	7.05817	0.130443	0	0	0	0	0	0	0	0
Exc L3-5 LINC00507 SLN	0	6.53659	0.407052	0	0	0	0	0	0	0	0
Exc L4-5 RORB ASCL1	0.0177909	3.09571	0	0	0	0	0	0	0	0	0
Inh L3-6 VIP KCTD13	0	2.98859	0.0250532	0	0	0	0	0	0	0	0
Inh L5-6 SST KLHL14	0.0134526	5.40236	0.0121358	0	0	0	0	0	0	0	0
Exc L4-5 RORB HNRNPA1P46	0	5.73959	0	0	0	0	0	0	0	0	0
	0.135039	2.24747	0	0	0	0.0438917	0	0	0	0	0
Exc L3-5 THEMIS UBE2F	0	6.41739	0.25121	0	0	0	0	0	0	0	0
Inh L1-3 VIP ZNF322P1	0.00127924	3.05483	0	0	0	0	0	0	0	0	0
Exc L3-4 RORB SEMA6D	0	5.64508	0	0	0	0	0	0	0	0	0
Inh L1 ADARB2 ADAM33	0	3.31699	0	0	0	0	0	0	0	0	0
VLMC L1-3 CYP1B1	0	1.77372	0	0.250005	0	0	0	0	0	0	0
Inh L1 PAX6 CA4	0	3.54233	0	0	0	0	0	0	0	0	0
Peri L1-6 MUSTN1	0	2.21057	0	1.12764	0	0	0	0	0	0	0
Exc L4-5 RORB AIM2	0	3.53592	0	0	0	0	0	0	0	0	0
Inh L1-2 PVALB TAC1	0	5.86352	0	0	0	0.0805803	0	0	0	0	0
Astro L1 FGFR3 FOS	0.121995	0.061647	0	0	0	0	0	0	0	0	0
Inh L1-2 VIP PPAPDC1A	0.0712375	2.17896	0	0	0	0.0499685	0	0	0	0	0
Oligo L4-6 MOBP COL18A1	0.0246581	4.13836	0	0	0	0	0	0	0	0	0
OPC L1-6 MYT1	0.0124634	2.72251	0	0	0	0	0	0	0	0	0
Inh L1-6 VIP RCN1	0.0557224	3.18	0.434101	0	0	0	0	0	0	0	0
Inh L5-6 PVALB FAM150B	0	2.78373	0	0	0	0	0	0	0	0	0
Inh L5-6 SST ISOC1	0.0361294	3.05882	0.00843806	0	0	0	0	0	0	0	0
Inh L1-3 PVALB WFDC2	0.0203226	6.74668	0.287914	0	0	0	0	0	0	0	0
Inh L6 SST NPY	0.0154414	7.25892	1.21388	0	0	0.0325515	0	0	0	0	0
Exc L4 RORB BHLHE22	0	2.53362	0	0	0	0	0	0	0	0	0
Exc L4-5 RORB LCN15	0	6.01358	0	0	0	0	0	0	0	0	0
Exc L5-6 THEMIS OR1J1	0.0318338	6.02874	0	0	0	0	0	0	0	0	0
Exc L6 FEZF2 TBCC	0	6.75938	5.6525	0	0	0	0	0	0	0	0
Inh L3 VIP CBLN1	0	2.94227	0	0	0	0	0	0	0	0	0
Micro L1-6 C1QC	8.80057	0.00888572	0	0	0	0	0	0	0	0	0
Exc L6 FEZF2 P4HA3	0.0221116	2.97595	1.90247	0	0	0	0	0	0	0	0
Exc L4-6 RORB HPCA	0	5.84916	0	0	0	0	0	0	0	0	0
Inh L2-4 SST AHR	0.0145913	6.27028	0	0	0	0	0	0	0	0	0
Inh L2-6 VIP VIP	0	2.36384	0.0509738	0	0	0	0	0	0	0	0
Exc L5 FEZF2 SCN7A	0	6.27488	1.64527	0	0	0.112524	0	0	0	0	0
Inh L1 LAMP5 GGT8P	0	3.09254	0	0	0	0	0	0	0	0	0
Exc L5-6 THEMIS IL7R	0	3.2589	0	0	0	0	0	0	0	0	0
Exc L6 FEZF2 SLITRK6	0	6.32523	5.91499	0	0	0	0	0	0	0	0
Inh L1-6 LAMP5 CA13	0	6.69571	0	0	0	0	0	0	0	0	0
Inh L1 VIP PCDH20	0	2.51137	0.0568222	0	0	0	0	0	0	0	0
Exc L5 RORB LINC01202	0	6.07277	0	0	0	0	0	0	0	0	0
Inh L1 VIP TNFAIP8L3	0.148118	7.32483	0.928009	0	0	0.0199974	0	0	0	0	0
Inh L1-6 VIP PENK	0.0829895	6.23373	0.860527	0	0	0	0	0	0	0	0
Inh L2-4 VIP DSEL	0	3.13187	0	0	0	0	0	0	0	0	0
Inh L1-2 PAX6 SCGN	0	6.35794	0	0	0	0	0	0	0	0	0
Exc L3-5 FEZF2 ONECUT1	0.1249	5.03181	0.589549	0	0	0	0	0	0	0	0
Inh L5 PVALB CNTNAP3P2	0.0112963	6.33601	0.0403253	0	0	0	0	0	0	0	0
Inh L6 LHX6 GLP1R	0.0246638	6.09362	0	0	0	0	0	0	0	0	0
Exc L6 FEZF2 VWA2	0.0179842	6.34212	0	0.652305	0	0	0	0	0	0	0
Exc L3-5 RORB CD24	0	5.42705	0	0	0	0	0	0	0	0	0
Inh L3-4 PVALB HOMER3	0.0131096	6.84731	0	0	0	0	0	0	0	0	0
Exc L5-6 THEMIS THTPA	0.021169	5.40634	0	0	0	0.0101203	0	0	0	0	0
Exc L5-6 FEZF2 CABP7	0.0262962	6.54593	0.684267	0.262427	0	0	0	0	0.029792	0.650127	0
Exc L6 THEMIS EGR3	0	6.12927	0	0	0	0	0	0	0	0	0
Inh L1-6 VIP RGS16	0	2.24523	0.0095032	0	0	0	0	0	0	0	0
Exc L3-5 THEMIS ELOF1	0	6.65191	0.435253	0	0	0	0	0	0	0	0
Exc L4-5 RORB LINC01474	0.000481763	2.863	0	0	0	0	0	0	0	0	0
Inh L2-5 VIP TOX2	0	2.68081	0.0397616	0	0	0	0	0	0	0	0
Inh L1-3 VIP ACHE	0	6.14461	0	0	0	0	0	0	0	0	0
Inh L3-5 SST MAFB	0.00617234	2.39878	0	0	0	0	0	0	0	0	0
Inh L5-6 SST TH	0.0295847	6.47875	0.510575	0	0	0	0	0	0	0	0
Exc L3 LINC00507 CTXN3	0	6.17138	0	0	0	0	0	0	0	0	0
Exc L5-6 FEZF2 MYBPHL	0.00445369	6.35629	1.01704	0	0	0.0269358	0	0	0	0	0
Exc L4 RORB CCDC168	0	3.01039	0	0	0	0	0	0	0	0	0
Exc L3-5 RORB HSPB3	0	5.80967	0	0	0	0	0	0	0	0	0
Inh L1 VIP SOX11	0.0552779	6.52641	0.490352	0	0	0	0	0	0	0	0
Inh L1 PAX6 GRIP2	0	3.61083	0	0	0	0	0	0	0	0	0
Exc L5 FEZF2 MORN2	0	6.88749	1.2539	0	0	0	0	0	0	0	0
Exc L3 LINC00507 PSRC1	0	6.6639	0.0859086	0	0	0	0	0	0	0	0
Inh L1 SST CXCL14	0	3.4831	0	0	0	0	0	0	0	0	0
Exc L5 FEZF2 DYRK2	0	7.16266	1.29492	0	0	0	0	0	0	0	0
Exc L3-4 RORB PRSS12	0	6.12712	0.0268144	0	0	0	0	0	0	0	0
Inh L2-4 PVALB C8orf4	0	6.83268	0	0	0	0	0	0	0	0	0
Inh L6 LAMP5 C1QL2	0	5.65714	0	0	0	0	0	0	0	0	0
Inh L1-2 VIP RPL41P3	0	6.77237	0.0110848	0	0	0	0	0	0	0	0
Exc L3 RORB CARTPT	0.0203409	6.57776	0.293802	0	0	0	0	0	0	0	0
Inh L6 LAMP5 ANKRD20A11P	0	1.79084	0	0	0	0	0	0	0	0	0.0850787
Inh L1 VIP PRSS8	0.00518984	6.24041	0.0740657	0	0	0	0	0	0	0	0
Inh L1-3 VIP CCDC184	0	5.47674	0	0	0	0	0	0	0	0	0
Exc L5-6 THEMIS GPR21	0	6.69406	0.124946	0	0	0	0	0	0	0	0
Exc L4-5 RORB RPL31P31	0	5.5486	0	0	0	0	0	0	0	0	0
Exc L6 THEMIS LINC00343	0	6.54741	0.00858365	0	0	0	0	0	0	0	0
Inh L1-3 PAX6 NABP1	0	7.09633	0.760225	0	0	0	0	0	0	0	0
Inh L1-5 VIP KCNJ2	0	6.56215	0.170344	0	0	0	0	0	0	0	0
Inh L2-4 VIP LGI2	0	6.47652	0.534447	0	0	0	0	0	0	0	0
Inh L1-4 LAMP5 DUSP4	0	6.14975	0	0	0	0	0	0	0	0	0
Exc L2-4 RORB GRIK1	0	6.21276	0.0417748	0	0	0	0	0	0	0	0
Oligo L4-6 OPALIN	0	2.83655	0.0741142	0	0	0	0	0	0	0	0
Exc L3 THEMIS PLA2G7	0	6.48424	0.300188	0	0	0	0	0	0	0	0
Exc L5 RORB SNHG7	0	6.42531	0.226419	0	0	0	0	0	0	0	0
Astro L1-6 FGFR3 ETNPPL	0.062422	0.889895	0	0	0	0	0	0	0	0	0
Exc L4 RORB CACNG5	0	2.25192	0	0	0	0	0	0	0	0	0
Exc L6 FEZF2 FAM95C	0.0126932	6.18836	0.251275	0	0	0	0	0	0	0	0
Inh L1-3 VIP GGH	0	2.41635	0	0	0	0	0	0	0	0	0
Exc L3-5 FEZF2 DCN	0	7.15133	1.25397	0	0	0	0	0	0	0	0
Exc L6 FEZF2 ETV4	0	5.88562	0	0.0357714	0	0	0	0	0	0	0
Exc L5-6 FEZF2 RSAD2	0	5.71983	0	0	0	0	0	0	0	0	0
Inh L1 ADARB2 DISP2	0	5.91547	0	0	0	0	0	0	0	0	0
Inh L5-6 LAMP5 SFTA3	0.00395414	5.96407	0	0	0	0	0	0	0	0	0
Exc L6 FEZF2 TBC1D26	0	6.38244	1.7533	0	0	0	0	0	0	0	0
Inh L4-5 PVALB TRIM67	0	3.25685	0	0	0	0	0	0	0	0	0
