# Supplementary material for: Microglial trogocytosis and the complement system regulate axonal pruning in vivo
Source: eLife. 2021 Mar 16;10:e62167. doi: 10.7554/eLife.62167 (PMC7963485; doi:10.7554/eLife.62167)
Supplement: Figure 7—source data 1. [file elife-62167-fig7-data1.xlsx]

## Sheet: b-02_Scatterplot
Fig. 7C
Pixel intensity scatterplot
x (aRCA3-mCherry)	y (SYN-pHtdGFP)	n
1	0	3172
2	0	2797
3	0	2596
4	0	1232
5	0	574
6	0	278
7	0	119
8	0	59
9	0	20
10	0	12
11	0	5
12	0	2
14	0	1
0	1	40609
1	1	24258
2	1	24953
3	1	27182
4	1	15203
5	1	6554
6	1	3428
7	1	1970
8	1	1149
9	1	733
10	1	427
11	1	257
12	1	161
13	1	147
14	1	92
15	1	62
16	1	35
17	1	28
18	1	23
19	1	12
20	1	9
21	1	11
22	1	1
23	1	3
24	1	5
26	1	1
30	1	1
0	2	23526
1	2	19050
2	2	22823
3	2	30279
4	2	18238
5	2	7083
6	2	3414
7	2	1788
8	2	1057
9	2	794
10	2	448
11	2	397
12	2	259
13	2	221
14	2	142
15	2	137
16	2	101
17	2	85
18	2	50
19	2	31
20	2	50
21	2	27
22	2	19
23	2	18
24	2	20
25	2	4
26	2	9
27	2	4
28	2	4
29	2	7
30	2	5
31	2	2
32	2	1
33	2	2
34	2	1
42	2	1
48	2	1
0	3	8323
1	3	8893
2	3	12557
3	3	20721
4	3	15581
5	3	6905
6	3	3354
7	3	1695
8	3	786
9	3	455
10	3	263
11	3	190
12	3	131
13	3	97
14	3	77
15	3	76
16	3	60
17	3	52
18	3	39
19	3	31
20	3	36
21	3	18
22	3	17
23	3	13
24	3	14
25	3	15
26	3	14
27	3	11
28	3	20
29	3	9
30	3	11
31	3	10
32	3	6
33	3	8
34	3	7
35	3	2
36	3	4
37	3	3
38	3	3
39	3	1
40	3	2
42	3	1
46	3	1
48	3	3
52	3	1
0	4	2850
1	4	3753
2	4	6332
3	4	12959
4	4	12514
5	4	6678
6	4	3906
7	4	2002
8	4	934
9	4	526
10	4	300
11	4	175
12	4	112
13	4	80
14	4	55
15	4	46
16	4	34
17	4	22
18	4	27
19	4	27
20	4	26
21	4	12
22	4	7
23	4	14
24	4	9
25	4	10
26	4	8
27	4	5
28	4	4
29	4	3
30	4	9
31	4	11
32	4	2
33	4	5
34	4	7
35	4	2
36	4	1
37	4	3
38	4	5
40	4	4
42	4	2
43	4	1
44	4	1
51	4	2
53	4	1
0	5	974
1	5	1566
2	5	3100
3	5	7239
4	5	8723
5	5	5680
6	5	3730
7	5	2264
8	5	1189
9	5	651
10	5	385
11	5	191
12	5	139
13	5	73
14	5	51
15	5	43
16	5	25
17	5	17
18	5	15
19	5	14
20	5	11
21	5	7
22	5	8
23	5	7
24	5	4
25	5	6
26	5	8
27	5	8
28	5	8
29	5	3
31	5	5
32	5	5
33	5	7
34	5	7
35	5	1
36	5	2
37	5	5
38	5	1
39	5	1
40	5	4
41	5	4
42	5	4
43	5	1
44	5	2
45	5	4
46	5	1
47	5	4
48	5	3
49	5	4
50	5	2
51	5	3
53	5	3
55	5	1
56	5	2
57	5	1
58	5	2
59	5	2
61	5	3
63	5	1
65	5	1
67	5	2
69	5	1
72	5	2
74	5	1
76	5	1
0	6	348
1	6	726
2	6	1592
3	6	4335
4	6	5993
5	6	4463
6	6	3350
7	6	2279
8	6	1333
9	6	828
10	6	477
11	6	299
12	6	161
13	6	110
14	6	65
15	6	37
16	6	32
17	6	7
18	6	14
19	6	13
20	6	10
21	6	8
22	6	1
23	6	2
24	6	4
25	6	3
26	6	4
27	6	1
28	6	2
30	6	3
33	6	3
35	6	3
36	6	2
37	6	5
38	6	1
39	6	3
40	6	2
41	6	2
43	6	1
44	6	3
45	6	2
46	6	5
47	6	1
48	6	4
49	6	1
51	6	2
52	6	2
53	6	2
57	6	3
58	6	2
59	6	4
63	6	3
66	6	1
70	6	1
73	6	1
74	6	1
76	6	1
86	6	2
0	7	155
1	7	329
2	7	815
3	7	2687
4	7	4139
5	7	3562
6	7	3052
7	7	2313
8	7	1521
9	7	968
10	7	607
11	7	357
12	7	207
13	7	133
14	7	90
15	7	65
16	7	34
17	7	21
18	7	15
19	7	13
20	7	6
21	7	5
22	7	2
23	7	2
24	7	7
25	7	2
26	7	2
27	7	3
28	7	1
29	7	3
34	7	2
35	7	6
37	7	1
39	7	1
40	7	1
41	7	1
42	7	1
43	7	1
45	7	3
46	7	3
49	7	2
51	7	3
54	7	1
55	7	2
56	7	1
58	7	3
59	7	1
63	7	2
64	7	1
65	7	2
66	7	2
67	7	1
69	7	1
70	7	1
71	7	1
73	7	3
74	7	2
76	7	1
79	7	2
80	7	2
93	7	1
98	7	1
0	8	53
1	8	152
2	8	379
3	8	1503
4	8	2721
5	8	2658
6	8	2598
7	8	2171
8	8	1400
9	8	1053
10	8	686
11	8	404
12	8	270
13	8	157
14	8	94
15	8	74
16	8	56
17	8	28
18	8	28
19	8	22
20	8	15
21	8	11
22	8	4
23	8	2
24	8	2
25	8	4
26	8	2
27	8	1
29	8	2
31	8	2
32	8	1
33	8	1
34	8	1
36	8	1
38	8	1
40	8	1
43	8	3
44	8	2
45	8	2
46	8	1
48	8	1
51	8	1
52	8	1
53	8	1
56	8	2
58	8	1
62	8	2
64	8	1
69	8	2
70	8	1
71	8	1
73	8	1
75	8	2
77	8	2
78	8	1
80	8	3
83	8	1
86	8	1
88	8	1
89	8	3
97	8	1
98	8	1
100	8	1
103	8	1
0	9	23
1	9	63
2	9	224
3	9	935
4	9	1818
5	9	1991
6	9	2081
7	9	1857
8	9	1418
9	9	1049
10	9	716
11	9	453
12	9	301
13	9	194
14	9	120
15	9	105
16	9	50
17	9	40
18	9	28
19	9	22
20	9	13
21	9	6
22	9	9
23	9	5
24	9	2
25	9	4
26	9	5
27	9	1
29	9	1
32	9	1
33	9	1
36	9	1
41	9	1
46	9	2
50	9	1
51	9	2
53	9	2
57	9	1
58	9	3
59	9	1
60	9	1
61	9	1
66	9	1
74	9	1
78	9	2
81	9	1
82	9	2
83	9	2
85	9	1
89	9	1
91	9	2
93	9	1
94	9	1
98	9	2
99	9	1
103	9	1
106	9	1
113	9	1
0	10	11
1	10	36
2	10	100
3	10	572
4	10	1209
5	10	1454
6	10	1631
7	10	1650
8	10	1332
9	10	1052
10	10	725
11	10	561
12	10	322
13	10	239
14	10	165
15	10	103
16	10	63
17	10	61
18	10	39
19	10	30
20	10	29
21	10	5
22	10	7
23	10	8
24	10	4
26	10	6
28	10	1
29	10	1
32	10	1
35	10	1
41	10	1
50	10	1
51	10	1
53	10	1
56	10	1
57	10	1
62	10	1
66	10	1
67	10	1
70	10	2
72	10	2
80	10	1
85	10	2
89	10	2
93	10	3
98	10	2
99	10	1
110	10	1
114	10	1
118	10	1
122	10	1
0	11	3
1	11	19
2	11	55
3	11	287
4	11	788
5	11	1081
6	11	1281
7	11	1395
8	11	1121
9	11	1066
10	11	736
11	11	563
12	11	358
13	11	270
14	11	179
15	11	128
16	11	93
17	11	62
18	11	39
19	11	36
20	11	15
21	11	15
22	11	11
23	11	8
24	11	4
25	11	4
26	11	3
27	11	1
28	11	2
29	11	1
30	11	1
31	11	1
32	11	1
34	11	1
38	11	1
41	11	1
42	11	1
43	11	1
47	11	2
56	11	2
58	11	1
65	11	1
66	11	2
69	11	1
76	11	1
77	11	1
81	11	1
83	11	2
89	11	1
90	11	1
94	11	1
95	11	1
96	11	1
101	11	1
103	11	1
105	11	1
110	11	2
113	11	2
116	11	1
119	11	1
123	11	1
0	12	1
1	12	12
2	12	46
3	12	181
4	12	499
5	12	800
6	12	1000
7	12	1182
8	12	989
9	12	850
10	12	719
11	12	538
12	12	396
13	12	296
14	12	230
15	12	159
16	12	107
17	12	71
18	12	52
19	12	45
20	12	35
21	12	15
22	12	13
23	12	8
24	12	9
25	12	4
26	12	3
27	12	2
28	12	2
30	12	1
31	12	1
34	12	1
35	12	1
47	12	1
49	12	1
51	12	2
53	12	1
57	12	2
58	12	1
60	12	1
65	12	1
74	12	1
76	12	1
80	12	1
81	12	1
82	12	1
88	12	1
93	12	1
94	12	1
97	12	1
98	12	3
100	12	1
101	12	1
102	12	3
103	12	1
109	12	1
118	12	1
121	12	1
1	13	2
2	13	13
3	13	106
4	13	361
5	13	492
6	13	722
7	13	866
8	13	930
9	13	868
10	13	736
11	13	570
12	13	438
13	13	343
14	13	272
15	13	192
16	13	125
17	13	99
18	13	67
19	13	46
20	13	48
21	13	27
22	13	26
23	13	9
24	13	10
25	13	4
26	13	3
27	13	2
29	13	2
30	13	2
31	13	1
34	13	1
35	13	1
36	13	1
37	13	1
38	13	1
40	13	1
41	13	1
44	13	1
64	13	3
78	13	2
83	13	1
90	13	1
99	13	1
103	13	1
106	13	1
109	13	1
110	13	1
114	13	1
116	13	1
119	13	1
122	13	1
123	13	2
128	13	1
131	13	1
0	14	1
2	14	9
3	14	71
4	14	253
5	14	390
6	14	592
7	14	718
8	14	771
9	14	782
10	14	642
11	14	543
12	14	448
13	14	363
14	14	293
15	14	202
16	14	133
17	14	123
18	14	84
19	14	58
20	14	45
21	14	27
22	14	21
23	14	14
24	14	7
25	14	9
26	14	10
27	14	2
28	14	1
29	14	3
30	14	1
31	14	5
32	14	1
35	14	2
36	14	1
37	14	1
38	14	1
62	14	1
65	14	1
67	14	1
80	14	1
82	14	1
87	14	1
94	14	1
105	14	1
109	14	1
120	14	1
123	14	1
1	15	1
2	15	7
3	15	39
4	15	146
5	15	251
6	15	416
7	15	508
8	15	618
9	15	622
10	15	573
11	15	506
12	15	373
13	15	312
14	15	280
15	15	200
16	15	140
17	15	103
18	15	88
19	15	66
20	15	44
21	15	38
22	15	34
23	15	20
24	15	13
25	15	6
26	15	12
27	15	7
28	15	7
29	15	2
30	15	1
32	15	2
34	15	2
45	15	1
52	15	1
53	15	1
58	15	2
81	15	1
100	15	1
107	15	1
114	15	1
129	15	1
2	16	6
3	16	25
4	16	96
5	16	189
6	16	317
7	16	471
8	16	532
9	16	554
10	16	510
11	16	457
12	16	361
13	16	331
14	16	255
15	16	223
16	16	177
17	16	132
18	16	126
19	16	93
20	16	59
21	16	33
22	16	43
23	16	23
24	16	20
25	16	15
26	16	12
27	16	12
28	16	6
29	16	3
30	16	3
31	16	1
33	16	1
34	16	2
48	16	1
56	16	2
73	16	1
74	16	1
106	16	1
123	16	1
129	16	1
131	16	1
2	17	2
3	17	13
4	17	63
5	17	136
6	17	218
7	17	358
8	17	418
9	17	466
10	17	435
11	17	403
12	17	367
13	17	311
14	17	258
15	17	220
16	17	185
17	17	134
18	17	93
19	17	93
20	17	48
21	17	45
22	17	29
23	17	44
24	17	19
25	17	15
26	17	11
27	17	12
28	17	9
29	17	4
30	17	2
31	17	2
32	17	5
34	17	2
43	17	1
46	17	1
51	17	1
55	17	1
57	17	1
59	17	1
94	17	1
99	17	2
101	17	1
106	17	1
107	17	1
120	17	1
129	17	1
2	18	1
3	18	7
4	18	37
5	18	85
6	18	202
7	18	268
8	18	332
9	18	370
10	18	407
11	18	350
12	18	306
13	18	263
14	18	248
15	18	234
16	18	162
17	18	125
18	18	119
19	18	88
20	18	82
21	18	44
22	18	48
23	18	22
24	18	27
25	18	14
26	18	15
27	18	12
28	18	11
29	18	6
30	18	3
31	18	3
33	18	3
34	18	2
37	18	1
40	18	1
43	18	1
73	18	1
100	18	1
114	18	1
2	19	1
3	19	10
4	19	29
5	19	66
6	19	158
7	19	242
8	19	273
9	19	394
10	19	335
11	19	356
12	19	303
13	19	296
14	19	245
15	19	193
16	19	157
17	19	119
18	19	100
19	19	94
20	19	63
21	19	57
22	19	51
23	19	31
24	19	27
25	19	21
26	19	22
27	19	11
28	19	14
29	19	6
30	19	4
31	19	6
32	19	1
33	19	1
34	19	2
35	19	1
36	19	1
46	19	1
52	19	1
53	19	1
64	19	1
73	19	1
86	19	1
88	19	1
123	19	2
128	19	1
3	20	4
4	20	20
5	20	43
6	20	79
7	20	138
8	20	225
9	20	292
10	20	305
11	20	335
12	20	290
13	20	305
14	20	214
15	20	191
16	20	160
17	20	131
18	20	111
19	20	105
20	20	81
21	20	69
22	20	64
23	20	50
24	20	36
25	20	28
26	20	17
27	20	17
28	20	15
29	20	8
30	20	5
31	20	3
32	20	4
33	20	1
34	20	3
35	20	2
36	20	1
37	20	1
39	20	2
41	20	1
43	20	1
44	20	1
47	20	1
52	20	1
53	20	1
89	20	1
119	20	1
120	20	1
128	20	1
3	21	3
4	21	9
5	21	30
6	21	48
7	21	130
8	21	161
9	21	223
10	21	261
11	21	287
12	21	224
13	21	230
14	21	233
15	21	183
16	21	174
17	21	141
18	21	87
19	21	90
20	21	91
21	21	60
22	21	51
23	21	40
24	21	34
25	21	33
26	21	35
27	21	12
28	21	17
29	21	8
30	21	6
31	21	5
32	21	7
34	21	1
35	21	2
36	21	1
37	21	1
47	21	1
57	21	1
64	21	1
105	21	1
117	21	1
2	22	1
3	22	2
4	22	5
5	22	16
6	22	49
7	22	116
8	22	151
9	22	211
10	22	240
11	22	250
12	22	240
13	22	234
14	22	195
15	22	189
16	22	153
17	22	125
18	22	97
19	22	99
20	22	84
21	22	68
22	22	69
23	22	67
24	22	33
25	22	32
26	22	24
27	22	17
28	22	22
29	22	9
30	22	7
31	22	7
32	22	3
33	22	4
34	22	2
35	22	7
36	22	1
37	22	2
39	22	2
40	22	1
41	22	2
42	22	1
47	22	1
54	22	2
59	22	1
88	22	1
104	22	1
105	22	1
2	23	1
3	23	4
4	23	4
5	23	8
6	23	25
7	23	90
8	23	90
9	23	170
10	23	193
11	23	226
12	23	208
13	23	201
14	23	174
15	23	165
16	23	157
17	23	109
18	23	111
19	23	126
20	23	77
21	23	50
22	23	79
23	23	45
24	23	43
25	23	24
26	23	29
27	23	21
28	23	13
29	23	12
30	23	9
31	23	8
32	23	4
33	23	4
34	23	4
35	23	3
37	23	1
38	23	1
40	23	1
41	23	2
67	23	1
78	23	1
89	23	1
113	23	1
3	24	1
4	24	3
5	24	9
6	24	22
7	24	66
8	24	83
9	24	127
10	24	170
11	24	182
12	24	195
13	24	169
14	24	172
15	24	151
16	24	147
17	24	118
18	24	84
19	24	91
20	24	84
21	24	61
22	24	53
23	24	50
24	24	39
25	24	37
26	24	32
27	24	27
28	24	20
29	24	15
30	24	13
31	24	13
32	24	10
33	24	6
34	24	7
35	24	2
36	24	4
37	24	2
38	24	3
39	24	1
40	24	2
41	24	1
43	24	1
46	24	1
54	24	1
66	24	1
69	24	1
99	24	1
102	24	1
123	24	1
4	25	5
5	25	5
6	25	18
7	25	47
8	25	54
9	25	102
10	25	130
11	25	143
12	25	161
13	25	153
14	25	166
15	25	140
16	25	158
17	25	123
18	25	89
19	25	103
20	25	76
21	25	69
22	25	47
23	25	48
24	25	28
25	25	35
26	25	18
27	25	25
28	25	20
29	25	20
30	25	10
31	25	9
32	25	10
33	25	9
34	25	4
35	25	3
36	25	3
37	25	1
38	25	2
39	25	2
40	25	2
41	25	2
42	25	1
43	25	2
52	25	1
76	25	1
104	25	1
111	25	1
5	26	8
6	26	10
7	26	27
8	26	52
9	26	89
10	26	115
11	26	154
12	26	135
13	26	161
14	26	165
15	26	174
16	26	136
17	26	124
18	26	107
19	26	104
20	26	79
21	26	58
22	26	50
23	26	46
24	26	29
25	26	34
26	26	31
27	26	38
28	26	25
29	26	24
30	26	15
31	26	14
32	26	14
33	26	7
34	26	9
35	26	1
36	26	4
37	26	4
38	26	4
39	26	3
40	26	4
41	26	3
42	26	2
48	26	1
88	26	1
92	26	1
99	26	1
121	26	1
3	27	1
4	27	6
5	27	2
6	27	6
7	27	21
8	27	45
9	27	74
10	27	94
11	27	114
12	27	129
13	27	132
14	27	151
15	27	134
16	27	111
17	27	108
18	27	87
19	27	94
20	27	67
21	27	72
22	27	57
23	27	53
24	27	35
25	27	45
26	27	34
27	27	23
28	27	23
29	27	24
30	27	13
31	27	15
32	27	9
33	27	10
34	27	5
35	27	5
36	27	4
37	27	2
38	27	2
39	27	1
40	27	2
41	27	2
42	27	1
45	27	1
70	27	1
74	27	1
82	27	1
5	28	3
6	28	6
7	28	15
8	28	31
9	28	55
10	28	92
11	28	88
12	28	96
13	28	112
14	28	128
15	28	127
16	28	109
17	28	101
18	28	104
19	28	92
20	28	70
21	28	70
22	28	64
23	28	67
24	28	45
25	28	37
26	28	33
27	28	25
28	28	24
29	28	20
30	28	14
31	28	9
32	28	13
33	28	10
34	28	8
35	28	8
36	28	3
37	28	4
38	28	2
39	28	2
40	28	3
41	28	1
42	28	1
47	28	1
48	28	1
52	28	1
5	29	3
6	29	6
7	29	15
8	29	22
9	29	35
10	29	53
11	29	80
12	29	88
13	29	112
14	29	116
15	29	111
16	29	116
17	29	111
18	29	83
19	29	108
20	29	68
21	29	54
22	29	45
23	29	48
24	29	41
25	29	41
26	29	44
27	29	30
28	29	21
29	29	25
30	29	15
31	29	6
32	29	12
33	29	2
34	29	9
35	29	3
36	29	1
37	29	2
38	29	1
39	29	3
41	29	1
42	29	1
44	29	1
48	29	1
49	29	1
75	29	1
97	29	1
104	29	1
5	30	1
6	30	3
7	30	15
8	30	24
9	30	34
10	30	64
11	30	65
12	30	83
13	30	110
14	30	131
15	30	105
16	30	88
17	30	115
18	30	89
19	30	99
20	30	83
21	30	61
22	30	56
23	30	39
24	30	44
25	30	33
26	30	30
27	30	30
28	30	28
29	30	29
30	30	21
31	30	15
32	30	9
33	30	12
34	30	8
35	30	8
36	30	2
38	30	1
39	30	4
40	30	2
41	30	1
42	30	1
43	30	1
47	30	1
49	30	1
117	30	1
4	31	1
6	31	5
7	31	7
8	31	11
9	31	29
10	31	54
11	31	54
12	31	62
13	31	85
14	31	91
15	31	104
16	31	90
17	31	93
18	31	80
19	31	70
20	31	75
21	31	61
22	31	57
23	31	54
24	31	30
25	31	33
26	31	36
27	31	32
28	31	15
29	31	26
30	31	19
31	31	25
32	31	21
33	31	8
34	31	19
35	31	7
36	31	10
37	31	7
38	31	5
39	31	2
40	31	2
42	31	2
43	31	1
44	31	3
45	31	3
47	31	1
48	31	1
49	31	3
51	31	1
52	31	1
68	31	1
120	31	1
3	32	1
7	32	5
8	32	6
9	32	27
10	32	39
11	32	56
12	32	69
13	32	77
14	32	81
15	32	100
16	32	91
17	32	105
18	32	75
19	32	84
20	32	60
21	32	67
22	32	58
23	32	41
24	32	34
25	32	38
26	32	31
27	32	16
28	32	30
29	32	20
30	32	19
31	32	15
32	32	18
33	32	14
34	32	11
35	32	3
36	32	13
37	32	4
38	32	5
39	32	2
40	32	2
41	32	1
42	32	6
43	32	1
44	32	3
45	32	1
5	33	1
6	33	2
7	33	4
8	33	12
9	33	21
10	33	24
11	33	42
12	33	58
13	33	63
14	33	66
15	33	73
16	33	96
17	33	89
18	33	80
19	33	79
20	33	76
21	33	49
22	33	60
23	33	55
24	33	40
25	33	37
26	33	35
27	33	22
28	33	22
29	33	34
30	33	18
31	33	13
32	33	18
33	33	8
34	33	17
35	33	4
36	33	6
37	33	6
38	33	7
39	33	3
40	33	2
41	33	2
42	33	1
43	33	2
44	33	2
45	33	1
47	33	3
50	33	1
51	33	1
61	33	1
86	33	1
95	33	1
115	33	1
5	34	2
6	34	1
7	34	6
8	34	5
9	34	13
10	34	24
11	34	47
12	34	36
13	34	62
14	34	50
15	34	69
16	34	80
17	34	79
18	34	63
19	34	67
20	34	62
21	34	57
22	34	49
23	34	42
24	34	33
25	34	26
26	34	39
27	34	23
28	34	23
29	34	20
30	34	20
31	34	13
32	34	17
33	34	17
34	34	8
35	34	8
36	34	7
37	34	5
38	34	3
39	34	2
40	34	1
43	34	4
44	34	1
45	34	1
46	34	1
48	34	2
51	34	1
6	35	1
7	35	4
8	35	7
9	35	10
10	35	17
11	35	37
12	35	40
13	35	39
14	35	55
15	35	57
16	35	78
17	35	60
18	35	68
19	35	52
20	35	67
21	35	56
22	35	57
23	35	40
24	35	39
25	35	30
26	35	29
27	35	22
28	35	33
29	35	25
30	35	23
31	35	15
32	35	11
33	35	12
34	35	10
35	35	6
36	35	6
37	35	6
38	35	3
39	35	3
40	35	4
41	35	2
42	35	2
43	35	1
44	35	1
46	35	1
53	35	1
55	35	1
59	35	1
74	35	1
5	36	1
6	36	1
7	36	4
8	36	5
9	36	5
10	36	8
11	36	20
12	36	30
13	36	37
14	36	41
15	36	66
16	36	82
17	36	67
18	36	63
19	36	58
20	36	60
21	36	59
22	36	46
23	36	40
24	36	36
25	36	43
26	36	36
27	36	29
28	36	22
29	36	22
30	36	26
31	36	26
32	36	12
33	36	12
34	36	15
35	36	10
36	36	11
37	36	8
38	36	3
39	36	1
40	36	3
41	36	4
42	36	5
43	36	2
44	36	1
45	36	1
46	36	2
48	36	2
50	36	1
51	36	1
67	36	1
132	36	1
6	37	2
7	37	1
8	37	2
9	37	6
10	37	21
11	37	9
12	37	26
13	37	37
14	37	46
15	37	52
16	37	34
17	37	50
18	37	61
19	37	57
20	37	65
21	37	56
22	37	64
23	37	57
24	37	32
25	37	36
26	37	41
27	37	22
28	37	22
29	37	32
30	37	20
31	37	11
32	37	13
33	37	10
34	37	11
35	37	15
36	37	11
37	37	5
38	37	6
39	37	8
40	37	9
41	37	4
42	37	2
43	37	1
44	37	1
45	37	2
48	37	2
50	37	1
54	37	1
56	37	1
6	38	1
7	38	1
8	38	5
9	38	7
10	38	7
11	38	26
12	38	25
13	38	38
14	38	49
15	38	49
16	38	50
17	38	48
18	38	60
19	38	54
20	38	61
21	38	59
22	38	39
23	38	40
24	38	41
25	38	25
26	38	38
27	38	27
28	38	23
29	38	28
30	38	20
31	38	18
32	38	28
33	38	19
34	38	16
35	38	2
36	38	12
37	38	6
38	38	4
39	38	2
40	38	4
42	38	3
43	38	5
44	38	1
45	38	2
46	38	2
47	38	2
49	38	2
51	38	1
52	38	1
60	38	2
68	38	1
71	38	1
97	38	1
101	38	1
8	39	2
9	39	5
10	39	4
11	39	15
12	39	21
13	39	24
14	39	31
15	39	34
16	39	44
17	39	53
18	39	58
19	39	48
20	39	51
21	39	41
22	39	43
23	39	51
24	39	42
25	39	37
26	39	32
27	39	21
28	39	28
29	39	23
30	39	15
31	39	25
32	39	12
33	39	20
34	39	12
35	39	17
36	39	12
37	39	7
38	39	5
39	39	5
40	39	7
41	39	4
42	39	3
43	39	3
44	39	2
45	39	1
46	39	1
47	39	3
48	39	1
51	39	1
52	39	1
54	39	1
55	39	1
60	39	1
61	39	1
67	39	1
68	39	1
75	39	1
8	40	2
9	40	1
10	40	6
11	40	11
12	40	17
13	40	22
14	40	22
15	40	29
16	40	45
17	40	37
18	40	56
19	40	56
20	40	44
21	40	41
22	40	48
23	40	35
24	40	33
25	40	28
26	40	26
27	40	25
28	40	19
29	40	15
30	40	26
31	40	17
32	40	14
33	40	14
34	40	15
35	40	9
36	40	3
37	40	8
38	40	3
39	40	3
40	40	8
41	40	2
42	40	9
44	40	2
47	40	1
50	40	1
61	40	2
115	40	1
7	41	3
8	41	1
9	41	2
10	41	2
11	41	10
12	41	10
13	41	24
14	41	18
15	41	32
16	41	26
17	41	35
18	41	44
19	41	42
20	41	43
21	41	47
22	41	27
23	41	39
24	41	35
25	41	31
26	41	27
27	41	30
28	41	22
29	41	17
30	41	13
31	41	20
32	41	9
33	41	9
34	41	10
35	41	9
36	41	13
37	41	12
38	41	6
39	41	10
40	41	2
41	41	4
42	41	3
43	41	5
44	41	1
45	41	5
46	41	1
47	41	1
48	41	1
49	41	1
50	41	2
53	41	1
54	41	1
56	41	2
73	41	1
8	42	1
10	42	3
11	42	3
12	42	10
13	42	19
14	42	16
15	42	17
16	42	27
17	42	30
18	42	39
19	42	45
20	42	56
21	42	36
22	42	38
23	42	59
24	42	45
25	42	23
26	42	31
27	42	37
28	42	29
29	42	16
30	42	23
31	42	13
32	42	14
33	42	9
34	42	13
35	42	11
36	42	4
37	42	9
38	42	7
39	42	3
40	42	10
41	42	2
42	42	4
43	42	3
44	42	6
45	42	2
47	42	2
48	42	1
49	42	2
56	42	1
57	42	1
123	42	1
8	43	1
9	43	2
10	43	4
11	43	4
12	43	6
13	43	6
14	43	13
15	43	19
16	43	34
17	43	35
18	43	38
19	43	49
20	43	39
21	43	34
22	43	33
23	43	35
24	43	35
25	43	30
26	43	34
27	43	18
28	43	17
29	43	21
30	43	18
31	43	19
32	43	14
33	43	14
[truncated: 5,494 more rows]
