# Supplementary material for: Microglial trogocytosis and the complement system regulate axonal pruning in vivo
Source: eLife. 2021 Mar 16;10:e62167. doi: 10.7554/eLife.62167 (PMC7963485; doi:10.7554/eLife.62167)
Supplement: Figure 7—source data 2. [file elife-62167-fig7-data2.xlsx]

## Sheet: Sheet1
Fig. 7D				Fig. 7E						Fig. 7—fig supp 1
Microglial green fluorescence
pHtdGFP				aRCA3 + pHtdGFP						pHtdGFP			aRCA3 + pHtdGFP
# labeled axons	Day 4	Day 5		# labeled axons	Day 4	Day 5				# labeled axons	change		# labeled axons	change
0	19.2591	29.0687		0	16.743	26.7272				0	9.80958		0	9.98424
0	15.4588	18.8202		0	17.598	24.056				0	3.36143		0	6.45801
0	35.9787	30.4549		0	14.5856	25.8547				0	-5.52381		0	11.2691
0	26.034	29.7524		0	32.1449	29.589				0	3.71841		0	-2.55589
0	21.7721	24.8094		0	19.7403	18.7702				0	3.03728		0	-0.970122
0	26.8024	24.5721		0	29.7875	14.4377				0	-2.23027		0	-15.3498
0	22.9441	23.74		0	25.5679	34.6922				0	0.79588		0	9.12432
0	28.7203	29.8391		0	22.5771	24.6462				0	1.11878		0	2.06913
0	23.6704	23.521		0	15.3733	16.7613				0	-0.14939		0	1.38809
0	19.1268	16.618		0	30.0192	25.1026				0	-2.50884		0	-4.91653
0	28.0274	22.4657		0	45.9582	32.2778				0	-5.56172		0	-13.6804
0	16.5417	14.1645		0	19.3699	26.6009				0	-2.3772		0	7.231
0	12.6955	17.1322		0	37.2989	28.084				0	4.43662		0	-9.21482
0	15.3425	16.1041		0	13.7187	17.9622				0	0.761629		0	4.24353
0	26.0244	28.4603		0	15.5537	17.6912				0	2.43588		0	2.13747
0	27.2793	23.0417		1	26.5122	22.5045				0	-4.23764		1	-4.0077
2	38.5217	35.9676		1	17.4806	19.7209				2	-2.55414		1	2.24026
2	19.1403	15.1271		1	23.2985	24.7941				2	-4.01323		1	1.49559
2	21.1006	31.477		1	25.2798	27.8849				2	10.3764		1	2.60516
3	27.7557	33.0125		2	14.5063	20.7504				3	5.25683		2	6.24411
3	17.2304	24.1899		2	29.6308	27.5553				3	6.9595		2	-2.07548
3	33.2383	43.0917		2	20.6947	24.3403				3	9.85335		2	3.64556
4	23.269	44.3115		2	12.0962	14.7309				4	21.0426		2	2.6347
4	19.7559	20.072		3	26.8767	16.7354				4	0.31612		3	-10.1413
4	25.8642	29.8369		3	36.6843	32.6262				4	3.97278		3	-4.05807
4	31.7337	39.7141		3	22.2644	22.7641				4	7.98045		3	0.499702
4	16.5977	21.7549		3	26.7989	26.7951				4	5.15725		3	-0.003753
5	23.9967	27.5335		3	34.0945	37.0635				5	3.53681		3	2.969
5	24.5677	47.4834		3	10.0677	15.7433				5	22.9156		3	5.67564
5	38.2595	34.607		3	12.428	24.1901				5	-3.65254		3	11.7621
6	24.7684	34.2671		4	17.8987	20.8681				6	9.49872		4	2.9694
6	33.3798	40.7044		4	51.2394	55.9436				6	7.3246		4	4.7042
6	36.8351	37.3761		5	14.3622	14.0226				6	0.540967		5	-0.339618
6	25.1517	39.3393		5	26.9351	25.5505				6	14.1876		5	-1.38456
7	25.747	27.9356		5	16.5619	22.4296				7	2.18858		5	5.86777
7	19.9769	29.7148		5	12.617	15.8575				7	9.73793		5	3.24043
7	20.1867	29.2368		6	39.631	44.1639				7	9.05003		6	4.53284
8	25.0544	31.4991		6	31.8694	32.6633				8	6.44469		6	0.793898
8	26.7077	32.9022		7	16.5128	20.6796				8	6.19454		7	4.16682
8	28.0162	42.0067		8	26.4806	20.0653				8	13.9905		8	-6.41532
				8	17.655	14.1611							8	-3.49391
Fig. 7G
axon arbor length (µm)
	pHtdGFP																				aRCA3 + pHtdGFP
Day 2	97.5	209.04	138.57	178.73	61.24	600.91	1035	798.5	541.56	245.84	177.53	1381	425.86	101.2	231.62	308.94	303.55	103.49	888.03	462.52	729.14	1833.74	102.33	285.67	255.06	1392.23	1186.3	341.56	676.9	373.9	441.75	196.18	819.29	564.98	289.57	442.34
Day 3	302.11	278.66	735.05	418.1	304.7	602.84	1094	988	651.4	536.7	514.7	1633.88	609.2	439.63	516.86	739.25	518.73	481.57	1194.8	1098.81	819.37	2318.1	511.5	558.7	694.71	1673.98	1828.27	745.7	758.5	597.83	1544.28	572.19	1427.77	1244.63	741.51	1250.95
Day 4	404.38	443.14	1011.78	531.32	591.05	606.29	1043	976.9	839.5	744.57	624.86	1743	762.65	419.6	639.41	762.39	508.37	691.96	1116.49	1609.28	1337.56	2426.95	829.17	663.39	836.57	1429.36	2052.84	845.2	817.2	700.1	1862.74	621.31	1710.34	1606.9	1065.22	1606.37
Day 5	535.92	480.08	1169.64	523.28	645.65	657.21	1070	1074.54	892.7	790.63	578.95	1787.5	934.6	524.73	813.08	917.81	447.77	773.05	1180.07	1853.29	959.42	2731.98	689.69	816.38	763.11	2043.01	1997.03	943.5	994.77	879.4	1960.85	734.32	1925.82	1699.6	1126.79	1682.31
Fig. 7G
# branches
	pHtdGFP																				aRCA3 + pHtdGFP
Day 2	9	7	15	16	9	24	56	38	42	21	18	50	39	6	14	12	20	6	29	37	38	107	10	24	21	16	77	24	46	25	36	15	47	31	30	45
Day 3	36	11	36	15	26	23	38	51	45	40	37	62	43	33	32	29	28	30	48	40	36	107	40	36	38	81	91	44	44	41	88	29	88	60	42	92
Day 4	40	19	32	24	41	19	31	40	57	36	34	66	39	37	31	33	21	35	38	57	51	113	46	30	43	91	107	41	47	43	80	54	81	102	49	88
Day 5	42	23	41	24	36	17	36	42	44	44	25	64	45	44	31	32	21	31	48	50	31	143	45	45	49	92	91	38	43	52	61	60	81	98	42	77
