# Supplementary material for: Microglial trogocytosis and the complement system regulate axonal pruning in vivo
Source: eLife. 2021 Mar 16;10:e62167. doi: 10.7554/eLife.62167 (PMC7963485; doi:10.7554/eLife.62167)
Supplement: Figure 8—source data 1. [file elife-62167-fig8-data1.xlsx]

## Sheet: Sheet1
Fig. 7C
Axon arbor length (µm)
	pHtdGFP							pHtdGFP + VAMP2-C3								pHtdGFP + VAMP2
Day 2	553.8	299.3	458.2	376.4	545.3	903.1	396.3	238.1	263.7	237.5	129.8	282.6	138.7	906.85	61.29	203.7	26.98	771.44	280.92	307.36	630.65	472.9	413	428.9	1076.98	472.33	177.49	374.69
Day 3	1327	1079.3	330.3	793.6	1291	1244.4	933.5	683.3	211.8	730.7	214.1	576.8	240.34	924.9	74	362.9	396	1072.56	543.09	382.08	855.95	526.84	615.61	800.89	1583.72	754.95	95.56	1280.69
Day 4	1446.7	1076.8	702	1074.4	1559.7	1089.4	1127.3	861.9	597.5	634.4	399.1	688.7	349.82	1029.59	152.69	485.9	705.15	1349.07	805.7	816.77	1054.71	711.74	787.82	974.16	1671.45	699.42	261.79	1943.44
Day 5	1833.3	1202.8	831.8	1275.4	1865.4	1030.2	1330.3	761.2	536.4	589.6	415.1	629	551.99	1007.77	154.98	985.7	864.11	1520.7	981.36	1296.47	1026.96	849.4	807.25	1062.52	1778.41	898.68	520.59	2357.85
Fig. 7D
# branches
	pHtdGFP							pHtdGFP + VAMP2-C3								pHtdGFP + VAMP2
Day 2	33	17	18	13	20	42	24	12	14	8	2	9	4	41	5	12	4	46	14	3	24	19	33	31	59	15	10	27
Day 3	74	63	13	19	51	46	36	32	7	21	5	18	12	34	4	37	24	74	23	33	42	34	53	36	88	34	6	58
Day 4	71	62	35	33	55	50	42	31	19	11	13	21	18	48	6	40	44	83	32	64	56	48	61	50	97	23	18	96
Day 5	82	65	27	39	72	35	38	28	24	8	12	17	27	44	4	80	41	79	32	70	50	57	53	45	121	30	27	106
